# Supplementary material
Source: PubMed Central journal article supplement (PMC3675691)
Supplement: supp_JCO.2011.37.9792_Data.pdf [file supp_JCO.2011.37.9792_Data.pdf]

**Supplemental Table 1.** Change in sex hormones, stratified by weight loss (%).

|       |                         |                   |    | Baseline                   | 12-months                  |            |            |                      |                      |
|-------|-------------------------|-------------------|----|----------------------------|----------------------------|------------|------------|----------------------|----------------------|
| Group | Biomarker               |                   | N  | Geometric Mean<br>(95% CI) | Geometric Mean<br>(95% CI) | $\Delta^a$ | % $\Delta$ | P-Value <sup>†</sup> | P-value <sup>‡</sup> |
| Diet  | Estrone<br>(pg/mL)      | CONTROL           | 80 | 32.0<br>(28.6, 35.8)       | 34.6<br>(31.4, 38.1)       | 2.6        | 8.1        | Ref.                 |                      |
|       |                         | Weight Loss <5%   | 28 | 38.2<br>(33.4, 43.7)       | 36.7<br>(31.6, 42.6)       | -1.6       | -4.1       | 0.05                 | Ref.                 |
|       |                         | Weight Loss 5-10% | 27 | 35.0<br>(30.2, 40.5)       | 33.2<br>(28.0, 39.2)       | -1.8       | -5.1       | 0.02                 | 0.85                 |
|       |                         | Weight Loss >10%  | 46 | 31.8<br>(28.4, 35.6)       | 28.4<br>(25.7, 31.5)       | -3.3       | -10.5      | <0.001               | 0.22                 |
|       |                         |                   |    |                            |                            |            |            | (<0.001*)            | 0.20**               |
|       | Estradiol<br>(pg/mL)    | CONTROL           | 80 | 10.9<br>(9.6-12.3)         | 11.4<br>(10.2, 12.8)       | 0.5        | 4.9        | Ref.                 |                      |
|       |                         | Weight Loss <5%   | 28 | 13.3<br>(11.7,15.2)        | 12.5<br>(10.5, 14.9)       | -0.8       | -6.3       | 0.09                 | Ref.                 |
|       |                         | Weight Loss 5-10% | 27 | 10.6<br>(9.0, 12.5)        | 9.4<br>(7.8, 11.4)         | -1.3       | -11.7      | 0.03                 | 0.42                 |
|       |                         | Weight Loss >10%  | 46 | 10.7<br>(9.4, 12.3)        | 8.6<br>(7.7,9.5)           | -2.2       | -20.4      | <0.0001              | <0.01                |
|       |                         |                   |    |                            |                            |            |            | (<0.0001*)           | <0.01**              |
|       | Testosterone<br>(ng/dL) | CONTROL           | 80 | 22.8<br>(20.2, 25.7)       | 23.2<br>(20.8, 25.9)       | 0.4        | 1.8        | Ref.                 |                      |
|       |                         | Weight Loss <5%   | 28 | 26.8<br>(22.8, 31.6)       | 25.7<br>(21.7, 30.5)       | -1.1       | -4.0       | 0.14                 | Ref.                 |

|       |                            |                   |    | Baseline                   | 12-months                  |            |            |                         |                       |
|-------|----------------------------|-------------------|----|----------------------------|----------------------------|------------|------------|-------------------------|-----------------------|
| Group | Biomarker                  |                   | N  | Geometric Mean<br>(95% CI) | Geometric Mean<br>(95% CI) | $\Delta^a$ | % $\Delta$ | P-Value <sup>†</sup>    | P-value <sup>‡</sup>  |
|       |                            | Weight Loss 5-10% | 27 | 21.9<br>(19.0, 25.1)       | 21.2<br>(18.1, 24.9)       | -0.6       | -2.9       | 0.35                    | 0.83                  |
|       |                            | Weight Loss >10%  | 46 | 23.5<br>(20.4, 27.0)       | 23.8<br>(20.8, 27.3)       | 0.4        | 1.6        | 0.91                    | 0.19                  |
|       |                            |                   |    |                            |                            |            |            | (0.81 <sup>*</sup> )    | 0.18 <sup>**</sup>    |
|       | Androstenedione<br>(ng/dL) | CONTROL           | 80 | 48.7<br>(43.9, 54.0)       | 49.4<br>(45.4, 53.7)       | 0.7        | 1.5        | Ref.                    |                       |
|       |                            | Weight Loss <5%   | 28 | 49.8<br>(42.9, 57.8)       | 45.8<br>(39.8, 52.7)       | -4.0       | -8.1       | 0.16                    | Ref.                  |
|       |                            | Weight Loss 5-10% | 27 | 55.9<br>(46.4, 67.4)       | 56.6<br>(46.3, 69.2)       | 0.7        | 1.2        | 0.96                    | 0.29                  |
|       |                            | Weight Loss >10%  | 46 | 50.5<br>(44.4, 57.4)       | 53.0<br>(47.7, 59.0)       | 2.5        | 5.0        | 0.62                    | 0.09                  |
|       |                            |                   |    |                            |                            |            |            | (0.57 <sup>*</sup> )    | 0.10 <sup>**</sup>    |
|       | SHBG<br>(nmol/L)           | CONTROL           | 80 | 34.7<br>(31.5, 38.2)       | 33.7<br>(30.3, 37.5)       | -0.9       | -2.7       | Ref.                    |                       |
|       |                            | Weight Loss <5%   | 28 | 36.9<br>(31.9, 42.8)       | 37.2<br>(32.6, 42.5)       | 0.3        | 0.8        | 0.32                    | Ref.                  |
|       |                            | Weight Loss 5-10% | 27 | 37.3<br>(30.7, 45.4)       | 43.5<br>(36.4, 52.0)       | 6.2        | 16.6       | <0.0001                 | <.01                  |
|       |                            | Weight Loss >10%  | 46 | 34.4<br>(30.4, 39.0)       | 47.8<br>(42.7, 53.5)       | 13.4       | 38.9       | <0.0001                 | <0.0001               |
|       |                            |                   |    |                            |                            |            |            | (<0.0001 <sup>*</sup> ) | <0.0001 <sup>**</sup> |
|       | Free Estradiol<br>(pg/mL)  | CONTROL           | 80 | 0.30<br>(0.27, 0.34)       | 0.32<br>(0.29, 0.36)       | 0.02       | 6.3        | Ref.                    |                       |

|          |                              |                   |    | Baseline                   | 12-months                  |            |            |                      |                      |
|----------|------------------------------|-------------------|----|----------------------------|----------------------------|------------|------------|----------------------|----------------------|
| Group    | Biomarker                    |                   | N  | Geometric Mean<br>(95% CI) | Geometric Mean<br>(95% CI) | $\Delta^a$ | % $\Delta$ | P-Value <sup>†</sup> | P-value <sup>‡</sup> |
|          |                              | Weight Loss <5%   | 28 | 0.35<br>(0.31, 0.41)       | 0.33<br>(0.27, 0.40)       | -<br>0.02  | -6.2       | 0.07                 | Ref.                 |
|          |                              | Weight Loss 5-10% | 27 | 0.28<br>(0.23, 0.34)       | 0.23<br>(0.19, 0.29)       | -<br>0.04  | -15.8      | <0.01                | 0.12                 |
|          |                              | Weight Loss >10%  | 46 | 0.29<br>(0.25, 0.34)       | 0.21<br>(0.18, 0.24)       | -<br>0.08  | -28.6      | <0.0001              | <0.0001              |
|          |                              |                   |    |                            |                            |            |            | (<0.0001*)           | <0.0001**            |
|          | Free Testosterone<br>(pg/mL) | CONTROL           | 80 | 4.9 (4.4, 5.6)             | 5.1<br>(4.6, 5.7)          | 0.1        | 2.6        | Ref.                 |                      |
|          |                              | Weight Loss <5%   | 28 | 5.7 (4.8, 6.7)             | 5.5<br>(4.6, 6.5)          | -0.2       | -4.1       | 0.10                 | Ref.                 |
|          |                              | Weight Loss 5-10% | 27 | 4.6 (3.7, 5.5)             | 4.1<br>(3.3, 5.1)          | -0.4       | -9.6       | 0.02                 | 0.30                 |
|          |                              | Weight Loss >10%  | 46 | 5.1 (4.4, 5.9)             | 4.4<br>(3.9, 5.1)          | -0.7       | -13.4      | <0.001               | 0.03                 |
|          |                              |                   |    |                            |                            |            |            | (<0.001*)            | 0.03**               |
| Exercise | Estrone<br>(pg/mL)           | CONTROL           | 80 | 32.0<br>(28.6, 35.8)       | 34.6<br>(31.4, 38.1)       | 2.6        | 8.1        | Ref.                 |                      |
|          |                              | Weight Loss <5%   | 72 | 33.6<br>(30.7, 36.8)       | 33.2<br>(30.3, 36.4)       | -0.4       | -1.2       | 0.06                 | Ref.                 |
|          |                              | Weight Loss >=5%  | 27 | 35.4<br>(30.5, 41.0)       | 31.4<br>(27.5, 35.9)       | -3.9       | -11.1      | <0.01                | 0.11                 |
|          |                              |                   |    |                            |                            |            |            | (<0.01*)             |                      |
|          | Estradiol<br>(pg/mL)         | CONTROL           | 80 | 10.9<br>(9.6, 12.3)        | 11.4<br>(10.2, 12.8)       | 0.5        | 4.9        | Ref.                 |                      |

|       |                         |                       |    | Baseline                | 12-months               |            |            |                       |                      |
|-------|-------------------------|-----------------------|----|-------------------------|-------------------------|------------|------------|-----------------------|----------------------|
| Group | Biomarker               |                       | N  | Geometric Mean (95% CI) | Geometric Mean (95% CI) | $\Delta^a$ | % $\Delta$ | P-Value <sup>†</sup>  | P-value <sup>‡</sup> |
|       |                         | Weight Loss <5%       | 72 | 11.1 (10.0, 12.3)       | 11.3 (10.2, 12.6)       | 0.2        | 2.1        | 0.75                  | Ref.                 |
|       |                         | Weight Loss $\geq$ 5% | 27 | 12.0 (10.3, 14.0)       | 9.9 (8.6, 11.3)         | -2.1       | -17.8      | <0.001                | <0.001               |
|       |                         |                       |    |                         |                         |            |            | (<0.01 <sup>*</sup> ) |                      |
|       | Testosterone (ng/dL)    | CONTROL               | 80 | 22.8 (20.2, 25.7)       | 23.2 (20.8, 25.9)       | 0.4        | 1.8        | Ref.                  |                      |
|       |                         | Weight Loss <5%       | 72 | 23.5 (21.5, 25.6)       | 23.5 (21.2, 25.9)       | 0.0        | -0.0       | 0.63                  | Ref.                 |
|       |                         | Weight Loss $\geq$ 5% | 27 | 25.5 (21.8, 29.9)       | 23.4 (19.3, 28.3)       | -2.1       | -8.3       | 0.09                  | 0.17                 |
|       |                         |                       |    |                         |                         |            |            | (0.12 <sup>*</sup> )  |                      |
|       | Androstenedione (ng/mL) | CONTROL               | 80 | 48.7 (43.9, 54.0)       | 49.4 (45.4, 53.7)       | 0.7        | 1.5        | Ref.                  |                      |
|       |                         | Weight Loss <5%       | 72 | 47.3 (43.3, 51.6)       | 48.8 (44.5, 53.6)       | 1.5        | 3.2        | 0.76                  | Ref.                 |
|       |                         | Weight Loss $\geq$ 5% | 27 | 54.7 (46.4, 64.4)       | 51.9 (42.7, 63.1)       | -2.8       | -5.0       | 0.33                  | 0.19                 |
|       |                         |                       |    |                         |                         |            |            | (0.50 <sup>*</sup> )  |                      |
|       | SHBG (nmol/L)           | CONTROL               | 80 | 34.7 (31.5, 38.2)       | 33.7 (30.3, 37.5)       | -0.9       | -2.7       | Ref.                  |                      |
|       |                         | Weight Loss <5%       | 72 | 39.4 (35.3, 43.9)       | 38.0 (34.2, 42.2)       | -1.4       | -3.5       | 0.91                  | Ref.                 |
|       |                         | Weight Loss $\geq$ 5% | 27 | 38.1 (33.2, 43.8)       | 40.3 (34.5, 47.1)       | 2.2        | 5.7        | 0.05                  | 0.03                 |
|       |                         |                       |    |                         |                         |            |            | (0.11 <sup>*</sup> )  |                      |

|                   |                              |                       |    | Baseline                   | 12-months                  |            |            |                      |                      |
|-------------------|------------------------------|-----------------------|----|----------------------------|----------------------------|------------|------------|----------------------|----------------------|
| Group             | Biomarker                    |                       | N  | Geometric Mean<br>(95% CI) | Geometric Mean<br>(95% CI) | $\Delta^a$ | % $\Delta$ | P-Value <sup>†</sup> | P-value <sup>‡</sup> |
|                   | Free Estradiol<br>(pg/mL)    | CONTROL               | 79 | 0.30<br>(0.27, 0.34)       | 0.32<br>(0.29, 0.36)       | 0.02       | 6.3        | Ref.                 |                      |
|                   |                              | Weight Loss <5%       | 72 | 0.29<br>(0.25, 0.32)       | 0.30<br>(0.26, 0.33)       | 0.01       | 3.5        | 0.97                 | Ref.                 |
|                   |                              | Weight Loss $\geq$ 5% | 27 | 0.32<br>(0.27, 0.37)       | 0.26<br>(0.22, 0.29)       | -<br>0.06  | -19.6      | <0.0001              | <0.0001              |
|                   |                              |                       |    |                            |                            |            |            | (0.001*)             |                      |
|                   | Free Testosterone<br>(pg/mL) | CONTROL               | 80 | 4.9<br>(4.4, 5.6)          | 5.1<br>(4.6, 5.7)          | 0.1        | 2.6        | Ref.                 |                      |
|                   |                              | Weight Loss <5%       | 72 | 4.8<br>(4.4, 5.2)          | 4.9<br>(4.4, 5.4)          | 0.1        | 1.9        | 0.78                 | Ref.                 |
|                   |                              | Weight Loss $\geq$ 5% | 27 | 5.3<br>(4.6, 6.3)          | 4.7<br>(4.0, 5.7)          | -0.6       | -11.1      | 0.02                 | 0.02                 |
|                   |                              |                       |    |                            |                            |            |            | (0.04*)              |                      |
| Diet+<br>Exercise | Estrone<br>(pg/mL)           | CONTROL               | 80 | 32.0<br>(28.6, 35.8)       | 34.6<br>(31.4, 38.1)       | 2.6        | 8.1        | Ref.                 |                      |
|                   |                              | Weight Loss <5%       | 18 | 39.0<br>(33.2, 45.7)       | 36.1<br>(30.4, 42.9)       | -2.8       | -7.3       | 0.02                 | Ref.                 |
|                   |                              | Weight Loss 5-<br>10% | 21 | 34.3<br>(27.4, 42.9)       | 29.5<br>(24.3, 35.7)       | -4.8       | -14.0      | 0.002                | 0.33                 |
|                   |                              | Weight Loss >10%      | 69 | 33.2<br>(30.2, 36.4)       | 29.0<br>(26.5, 31.8)       | -4.1       | -12.5      | <.0001               | 0.30                 |
|                   |                              |                       |    |                            |                            |            |            | (<.0001*)            | 0.43**               |
|                   | Estradiol<br>(pg/mL)         | CONTROL               | 80 | 10.9<br>(9.6, 12.3)        | 11.4<br>(10.2, 12.8)       | 0.5        | 4.9        | Ref.                 |                      |

|       |                            |                   |    | Baseline                   | 12-months                  |            |            |                        |                      |
|-------|----------------------------|-------------------|----|----------------------------|----------------------------|------------|------------|------------------------|----------------------|
| Group | Biomarker                  |                   | N  | Geometric Mean<br>(95% CI) | Geometric Mean<br>(95% CI) | $\Delta^a$ | % $\Delta$ | P-Value <sup>†</sup>   | P-value <sup>‡</sup> |
|       |                            | Weight Loss <5%   | 18 | 13.4<br>(11.2, 16.0)       | 12.2<br>(10.1, 14.7)       | -1.2       | -8.7       | 0.07                   | Ref.                 |
|       |                            | Weight Loss 5-10% | 21 | 11.4<br>(8.9, 14.6)        | 8.8<br>(7.0, 11.0)         | -2.7       | -23.2      | <.0001                 | 0.04                 |
|       |                            | Weight Loss >10%  | 69 | 11.3<br>(10.2, 12.6)       | 8.6<br>(7.8, 9.6)          | -2.7       | -23.7      | <.0001                 | 0.01                 |
|       |                            |                   |    |                            |                            |            |            | (<.0001 <sup>*</sup> ) | 0.03 <sup>**</sup>   |
|       | Testosterone<br>(ng/dL)    | CONTROL           | 80 | 22.8<br>(20.2, 25.7)       | 23.2<br>(20.8, 25.9)       | 0.4        | 1.8        | Ref.                   |                      |
|       |                            | Weight Loss <5%   | 18 | 29.0<br>(24.1, 35.0)       | 26.1<br>(22.2, 30.7)       | -2.9       | -10.1      | 0.14                   | Ref.                 |
|       |                            | Weight Loss 5-10% | 21 | 20.6<br>(17.2, 24.6)       | 19.7<br>(16.8, 23.2)       | -0.8       | -4.0       | 0.30                   | 0.49                 |
|       |                            | Weight Loss >10%  | 69 | 24.2<br>(22.0, 26.5)       | 22.5<br>(20.4, 24.9)       | -1.6       | -6.7       | 0.02                   | 0.67                 |
|       |                            |                   |    |                            |                            |            |            | (0.04 <sup>*</sup> )   | 0.78 <sup>**</sup>   |
|       | Androstenedione<br>(ng/mL) | CONTROL           | 80 | 48.7<br>(43.9, 54.0)       | 49.4<br>(45.4, 53.7)       | 0.7        | 1.5        | Ref.                   |                      |
|       |                            | Weight Loss <5%   | 18 | 59.3<br>(49.2, 71.4)       | 50.5<br>(39.8, 64.2)       | -8.7       | -14.7      | 0.07                   | Ref.                 |
|       |                            | Weight Loss 5-10% | 21 | 45.8<br>(37.7, 55.6)       | 48.8<br>(41.7, 57.2)       | 3.1        | 6.7        | 0.53                   | 0.04                 |
|       |                            | Weight Loss >10%  | 69 | 54.7<br>(50.6, 59.1)       | 51.4<br>(47.1, 56.2)       | -3.3       | -6.0       | 0.17                   | 0.30                 |
|       |                            |                   |    |                            |                            |            |            | (0.31 <sup>*</sup> )   | 0.63 <sup>**</sup>   |

|       |                              |                   |    | Baseline                   | 12-months                  |            |            |                      |                      |
|-------|------------------------------|-------------------|----|----------------------------|----------------------------|------------|------------|----------------------|----------------------|
| Group | Biomarker                    |                   | N  | Geometric Mean<br>(95% CI) | Geometric Mean<br>(95% CI) | $\Delta^a$ | % $\Delta$ | P-Value <sup>†</sup> | P-value <sup>‡</sup> |
|       | SHBG<br>(nmol/L)             | CONTROL           | 80 | 34.7<br>(31.5, 38.2)       | 33.7<br>(30.3, 37.5)       | -0.9       | -2.7       | Ref.                 |                      |
|       |                              | Weight Loss <5%   | 18 | 35.6<br>(30.4, 41.9)       | 36.0<br>(30.8, 42.0)       | 0.3        | 0.9        | 0.24                 | Ref.                 |
|       |                              | Weight Loss 5-10% | 21 | 37.5<br>(32.1, 43.8)       | 41.6<br>(35.8, 48.3)       | 4.1        | 10.8       | <.01                 | 0.07                 |
|       |                              | Weight Loss >10%  | 69 | 33.5<br>(30.5,30.7)        | 42.0<br>(42.0, 48.8)       | 11.8       | 35.3       | (<.0001              | <.0001               |
|       |                              |                   |    |                            |                            |            |            | (<.0001*)            | <.0001**             |
|       | Free Estradiol<br>(pg/mL)    | CONTROL           | 79 | 0.30<br>(0.27, 0.34)       | 0.32<br>(0.29, 0.36)       | 0.02       | 6.3        | Ref.                 |                      |
|       |                              | Weight Loss <5%   | 18 | 0.36<br>(0.30, 0.43)       | 0.33<br>(0.27, 0.39)       | -0.03      | -8.9       | 0.05                 | Ref.                 |
|       |                              | Weight Loss 5-10% | 21 | 0.30<br>(0.24, 0.39)       | 0.22<br>(0.18, 0.28)       | -0.08      | -25.7      | <.0001               | 0.03                 |
|       |                              | Weight Loss >10%  | 69 | 0.31<br>(0.28, 0.35)       | 0.22<br>(0.19, 0.24)       | -0.1       | -30.7      | <.0001               | 0.0001               |
|       |                              |                   |    |                            |                            |            |            | (<.0001*)            | <.001**              |
|       | Free Testosterone<br>(pg/mL) | CONTROL           | 80 | 4.9<br>(4.4, 5.6)          | 5.1<br>(4.6, 5.7)          | 0.1        | 2.6        | Ref.                 |                      |
|       |                              | Weight Loss <5%   | 18 | 6.3<br>(5.2, 7.6)          | 5.6<br>(4.8, 6.6)          | -0.7       | -10.4      | 0.11                 | Ref.                 |
|       |                              | Weight Loss 5-10% | 21 | 4.3<br>(3.7, 5.1)          | 4.0<br>(3.5, 4.5)          | -0.4       | -8.6       | 0.06                 | 0.83                 |

|       |           |                  |    | Baseline                   | 12-months                  |            |            |                        |                      |
|-------|-----------|------------------|----|----------------------------|----------------------------|------------|------------|------------------------|----------------------|
| Group | Biomarker |                  | N  | Geometric Mean<br>(95% CI) | Geometric Mean<br>(95% CI) | $\Delta^a$ | % $\Delta$ | P-Value <sup>†</sup>   | P-value <sup>‡</sup> |
|       |           | Weight Loss >10% | 69 | 5.4<br>(4.9, 5.9)          | 4.3<br>(3.9, 4.8)          | -1.0       | -19.2      | <.0001 <sup>†</sup>    | 0.23                 |
|       |           |                  |    |                            |                            |            |            | (<.0001 <sup>*</sup> ) | 0.10 <sup>**</sup>   |

Abbreviations: CI, confidence interval; SHBG, sex hormone-binding globulin;  $\Delta$ , change.

<sup>a</sup>: Change from baseline to 12-months

<sup>†</sup>Testing difference in change from baseline to 12 months in hormones compared to Controls.

<sup>‡</sup>Testing difference in change from baseline to 12 months in hormones compared to Weight Loss <5% Group, excluding Controls

<sup>\*</sup>Testing for a trend in change from baseline to 12 months in hormones from Controls through Weight Loss  $\geq$ 10% Group

<sup>\*\*</sup>Testing for a trend in change from baseline to 12 months in hormones from >5% Weight Loss Group through Weight Loss  $\geq$ 10% Group



**Supplemental Table 2.** Change in sex hormones measures, stratified by **body fat loss (%)**

| Group | Biomarker                     |                    | N  | Baseline<br>Geometric Mean<br>(95% CI) | 12-months<br>Geometric Mean<br>(95% CI) | $\Delta$ | % $\Delta$              | P-Value <sup>†</sup>   | P-value <sup>‡</sup> |
|-------|-------------------------------|--------------------|----|----------------------------------------|-----------------------------------------|----------|-------------------------|------------------------|----------------------|
| Diet  | Estrone<br>(pg/mL)            | CONTROL            | 80 | 32.0<br>(28.6, 35.8)                   | 34.6<br>(31.4, 38.1)                    | 2.6      | 8.1                     | Ref.                   |                      |
|       |                               | Decrease <0.9%     | 25 | 40.9<br>(35.5, 47.1)                   | 37.2<br>(31.7, 43.5)                    | -3.7     | -9.1                    | 0.007                  | Ref.                 |
|       |                               | Decrease <0.9-4.4% | 31 | 34.5<br>(30.5, 38.9)                   | 32.9<br>(28.2, 38.3)                    | -1.6     | -5.0                    | 0.02                   | 0.42                 |
|       |                               | Decrease > 4.4%    | 45 | 31.0<br>(27.5, 34.9)                   | 28.5<br>(25.6, 31.7)                    | -2.5     | -8.1                    | 0.003                  | 0.85                 |
|       |                               |                    |    |                                        |                                         |          | (0.003*)                | (0.95**)               |                      |
|       | Estradiol<br>(pg/mL)          | CONTROL            | 80 | 10.9<br>(9.6-12.3)                     | 11.4<br>(10.2, 12.8)                    | 0.5      | 4.9                     | Ref.                   |                      |
|       |                               | Decrease <0.9%     | 25 | 14.1<br>(12.2,16.3)                    | 13.5<br>(11.3, 16.0)                    | -0.7     | -4.7                    | 0.12                   | Ref.                 |
|       |                               | Decrease <0.9-4.4% | 31 | 10.6<br>(9.0, 12.5)                    | 9.4<br>(7.8, 11.4)                      | -1.3     | -11.7                   | 0.005                  | 0.10                 |
|       |                               | Decrease > 4.4%    | 45 | 10.7<br>(9.4, 12.3)                    | 8.6<br>(7.7,9.5)                        | -2.2     | -20.4                   | <0.0001                | 0.002                |
|       |                               |                    |    |                                        |                                         |          | (<0.0001 <sup>†</sup> ) | (<0.01 <sup>**</sup> ) |                      |
|       | Total Testosterone<br>(ng/dL) | CONTROL            | 80 | 22.8<br>(20.2, 25.7)                   | 23.2<br>(20.8, 25.9)                    | 0.4      | 1.8                     | Ref.                   |                      |
|       |                               | Decrease <0.9%     | 25 | 29.1<br>(25.1, 33.9)                   | 27.6<br>(23.6, 32.3)                    | -1.5     | -5.3                    | 0.06                   | Ref.                 |
|       |                               | Decrease <0.9-4.4% | 31 | 23.5<br>(20.1, 27.4)                   | 23.5<br>(19.9, 27.7)                    | 0.0      | 0.0                     | 0.67                   | 0.21                 |
|       |                               | Decrease > 4.4%    | 45 | 21.7<br>(19.0, 25.8)                   | 21.7<br>(19.0, 25.9)                    | 0.1      | 0.2                     | 0.70                   | 0.20                 |

| Group | Biomarker                  |                        | N  | Baseline<br>Geometric Mean<br>(95% CI) | 12-months<br>Geometric Mean<br>(95% CI) | Δ    | %Δ    | P-Value <sup>†</sup>    | P-value <sup>‡</sup>     |
|-------|----------------------------|------------------------|----|----------------------------------------|-----------------------------------------|------|-------|-------------------------|--------------------------|
|       |                            |                        |    |                                        |                                         |      |       | (0.73 <sup>*</sup> )    | (0.27 <sup>**</sup> )    |
|       | Androstenedione<br>(ng/dL) | CONTROL                | 80 | 48.7<br>(43.9, 54.0)                   | 49.4<br>(45.4, 53.7)                    | 0.7  | 1.5   | Ref.                    |                          |
|       |                            | Decrease <0.9%         | 25 | 55.7<br>(47.3, 65.6)                   | 52.2<br>(44.2, 61.6)                    | -3.5 | -6.3  | 0.30                    | Ref.                     |
|       |                            | Decrease <0.9-<br>4.4% | 31 | 45.6<br>(39.8, 52.4)                   | 48.5<br>(42.4, 55.6)                    | 2.9  | 6.3   | 0.53                    | 0.17                     |
|       |                            | Decrease > 4.4%        | 45 | 54.1<br>(46.9, 62.3)                   | 54.0<br>(47.3, 61.7)                    | -0.1 | 0.2   | 0.79                    | 0.46                     |
|       |                            |                        |    |                                        |                                         |      |       | (0.97 <sup>*</sup> )    | (0.59 <sup>**</sup> )    |
|       | SHBG<br>(nmol/L)           | CONTROL                | 80 | 34.7<br>(31.5, 38.2)                   | 33.7<br>(30.3, 37.5)                    | -0.9 | -2.7  | Ref.                    |                          |
|       |                            | Decrease <0.9%         | 25 | 33.5<br>(28.0, 40.2)                   | 35.1<br>(30.2, 40.9)                    | 1.6  | 4.8   | 0.11                    | Ref.                     |
|       |                            | Decrease <0.9-<br>4.4% | 31 | 35.0<br>(29.5, 41.4)                   | 40.4<br>(34.8, 46.8)                    | 5.4  | 15.4  | <0.0001                 | 0.09                     |
|       |                            | Decrease > 4.4%        | 45 | 37.9<br>(33.6, 42.7)                   | 51.6<br>(46.5, 57.2)                    | 13.7 | 36.1  | <0.0001                 | <0.0001                  |
|       |                            |                        |    |                                        |                                         |      |       | (<0.0001 <sup>*</sup> ) | (<0.0001 <sup>**</sup> ) |
|       | Free Estradiol<br>(pg/mL)  | CONTROL                | 80 | 0.30<br>(0.27, 0.34)                   | 0.32<br>(0.29, 0.36)                    | 0.02 | 6.3   | Ref.                    |                          |
|       |                            | Decrease <0.9%         | 25 | 0.39<br>(0.33, 0.44)                   | 0.36<br>(0.30, 0.44)                    | -    | -5.5  | 0.08                    | Ref.                     |
|       |                            | Decrease <0.9-<br>4.4% | 31 | 0.31<br>(0.27, 0.37)                   | 0.26<br>(0.21, 0.32)                    | -    | -17.7 | 0.0001                  | 0.03                     |
|       |                            | Decrease > 4.4%        | 45 | 0.26<br>(0.22, 0.30)                   | 0.19<br>(0.17, 0.21)                    | -    | -27.5 | <0.0001                 | <0.0001                  |
|       |                            |                        |    |                                        |                                         |      |       | (<0.0001 <sup>*</sup> ) | (<0.0001 <sup>**</sup> ) |

|          |                           |                    |    | Baseline                | 12-months               |      |       |                        |                       |
|----------|---------------------------|--------------------|----|-------------------------|-------------------------|------|-------|------------------------|-----------------------|
| Group    | Biomarker                 |                    | N  | Geometric Mean (95% CI) | Geometric Mean (95% CI) | Δ    | %Δ    | P-Value <sup>†</sup>   | P-value <sup>‡</sup>  |
|          | Free Testosterone (pg/mL) | CONTROL            | 80 | 4.9 (4.4, 5.6)          | 5.1 (4.6, 5.7)          | 0.1  | 2.6   | Ref.                   |                       |
|          |                           | Decrease <0.9%     | 28 | 6.4 (5.4, 7.6)          | 6.0 (5.1, 7.1)          | -0.4 | -6.6  | 0.03                   | Ref.                  |
|          |                           | Decrease <0.9-4.4% | 27 | 5.1 (4.2, 6.1)          | 4.8 (3.9, 5.8)          | -0.3 | -6.0  | 0.04                   | 0.88                  |
|          |                           | Decrease > 4.4%    | 46 | 4.5 (4.0, 5.2)          | 4.0 (3.4, 4.5)          | -0.6 | -14.1 | <0.001                 | 0.10                  |
|          |                           |                    |    |                         |                         |      |       | (<0.001 <sup>*</sup> ) | (0.08 <sup>**</sup> ) |
| Exercise | Estrone (pg/mL)           | CONTROL            | 80 | 32.0 (28.6, 35.8)       | 34.6 (31.4, 38.1)       | 2.6  | 8.1   | Ref.                   |                       |
|          |                           | Decrease <0.9%     | 45 | 36.7 (32.7, 41.2)       | 35.1 (31.4, 39.2)       | -1.6 | -4.4  | 0.01                   | Ref.                  |
|          |                           | Decrease <0.9-4.4% | 43 | 31.0 (27.8, 34.5)       | 29.6 (27.5, 35.9)       | -1.4 | -4.4  | 0.04                   | 0.10                  |
|          |                           | Decrease > 4.4%    | 11 | 36.6 (28.5, 47.1)       | 36.3 (30.8, 42.9)       | -0.3 | -0.8  | 0.35                   | 0.67                  |
|          |                           |                    |    |                         |                         |      |       | (0.05 <sup>*</sup> )   | (0.73 <sup>**</sup> ) |
|          | Estradiol (pg/mL)         | CONTROL            | 80 | 10.9 (9.6, 12.3)        | 11.4 (10.2, 12.8)       | 0.5  | 4.9   | Ref.                   |                       |
|          |                           | Decrease <0.9%     | 45 | 12.0 (10.6, 13.6)       | 11.9 (10.4, 13.6)       | -0.1 | -0.6  | 0.43                   | Ref.                  |
|          |                           | Decrease <0.9-4.4% | 43 | 10.4 (9.1, 11.9)        | 10.0 (8.8, 11.2)        | -0.4 | -4.2  | 0.20                   | 0.52                  |
|          |                           | Decrease > 4.4%    | 11 | 12.8 (9.8, 16.7)        | 11.0 (9.1, 13.4)        | -1.8 | -14.0 | 0.01                   | 0.04                  |
|          |                           |                    |    |                         |                         |      |       | (0.04 <sup>*</sup> )   | (0.08 <sup>**</sup> ) |

|       |                               |                    |    | Baseline                   | 12-months                  |      |      |                      |                       |
|-------|-------------------------------|--------------------|----|----------------------------|----------------------------|------|------|----------------------|-----------------------|
| Group | Biomarker                     |                    | N  | Geometric Mean<br>(95% CI) | Geometric Mean<br>(95% CI) | Δ    | %Δ   | P-Value <sup>†</sup> | P-value <sup>‡</sup>  |
|       | Total Testosterone<br>(ng/dL) | CONTROL            | 80 | 22.8<br>(20.2, 25.7)       | 23.2<br>(20.8, 25.9)       | 0.4  | 1.8  | Ref.                 |                       |
|       |                               | Decrease <0.9%     | 45 | 24.3<br>(21.9, 26.9)       | 23.4<br>(21.0, 26.1)       | -0.9 | -3.6 | 0.14                 | Ref.                  |
|       |                               | Decrease <0.9-4.4% | 43 | 23.2<br>(20.6, 26.1)       | 22.9<br>(19.6, 26.8)       | -0.3 | -1.2 | 0.60                 | 0.68                  |
|       |                               | Decrease > 4.4%    | 11 | 26.2<br>(19.3, 35.7)       | 25.8<br>(20.3, 32.9)       | -0.4 | -1.6 | 0.66                 | 0.80                  |
|       |                               |                    |    |                            |                            |      |      | (0.51 <sup>*</sup> ) | (0.67 <sup>**</sup> ) |
|       | Androstenedione<br>(ng/mL)    | CONTROL            | 80 | 48.7<br>(43.9, 54.0)       | 49.4<br>(45.4, 53.7)       | 0.7  | 1.5  | Ref.                 |                       |
|       |                               | Decrease <0.9%     | 45 | 46.0<br>(41.0, 51.5)       | 47.4<br>(42.3, 53.1)       | 1.4  | 3.1  | 0.79                 | Ref.                  |
|       |                               | Decrease <0.9-4.4% | 43 | 50.5<br>(44.5, 57.0)       | 49.0<br>(42.5, 56.5)       | -1.4 | -2.7 | 0.47                 | 0.30                  |
|       |                               | Decrease > 4.4%    | 11 | 59.4<br>(49.3, 71.6)       | 63.3<br>(50.3, 79.7)       | 3.9  | 6.6  | 0.64                 | 0.74                  |
|       |                               |                    |    |                            |                            |      |      | (0.85 <sup>*</sup> ) | (0.84 <sup>**</sup> ) |
|       | SHBG<br>(nmol/L)              | CONTROL            | 80 | 34.7<br>(31.5, 38.2)       | 33.7<br>(30.3, 37.5)       | -0.9 | -2.7 | Ref.                 |                       |
|       |                               | Decrease <0.9%     | 45 | 38.2<br>(34.1, 42.8)       | 36.9<br>(33.1, 41.3)       | -1.3 | -3.3 | 0.96                 | Ref.                  |
|       |                               | Decrease <0.9-4.4% | 43 | 40.7<br>(34.8, 47.5)       | 40.0<br>(34.3, 46.7)       | -0.7 | -1.6 | 0.66                 | 0.63                  |
|       |                               | Decrease > 4.4%    | 11 | 36.2<br>(29.6, 44.2)       | 40.2<br>(32.0, 50.6)       | 4.0  | 11.1 | 0.002                | 0.002                 |
|       |                               |                    |    |                            |                            |      |      | (0.09 <sup>*</sup> ) | (0.02 <sup>**</sup> ) |

|               |                           |                    |    | Baseline                | 12-months               |      |       |                      |                       |
|---------------|---------------------------|--------------------|----|-------------------------|-------------------------|------|-------|----------------------|-----------------------|
| Group         | Biomarker                 |                    | N  | Geometric Mean (95% CI) | Geometric Mean (95% CI) | Δ    | %Δ    | P-Value <sup>†</sup> | P-value <sup>‡</sup>  |
|               | Free Estradiol (pg/mL)    | CONTROL            | 80 | 0.30 (0.27, 0.34)       | 0.32 (0.29, 0.36)       | 0.02 | 6.3   | Ref.                 |                       |
|               |                           | Decrease <0.9%     | 45 | 0.32 (0.28,0.36)        | 0.32 (0.27, 0.37)       | 0.00 | 0.53  | 0.54                 | Ref.                  |
|               |                           | Decrease <0.9-4.4% | 43 | 0.26 (0.23, 0.31)       | 0.25 (0.22, 0.29)       | -    | -3.6  | 0.20                 | 0.46                  |
|               |                           | Decrease > 4.4%    | 11 | 0.35 (0.26, 0.46)       | 0.29 (0.23, 0.36)       | -0.1 | -17.1 | 0.002                | 0.008                 |
|               |                           |                    |    |                         |                         |      |       | (0.02 <sup>*</sup> ) | (0.03 <sup>**</sup> ) |
|               | Free Testosterone (pg/mL) | CONTROL            | 80 | 4.9 (4.4, 5.6)          | 5.1 (4.6, 5.7)          | 0.1  | 2.6   | Ref.                 |                       |
|               |                           | Decrease <0.9%     | 45 | 5.1 (4.5, 5.7)          | 5.0 (4.5, 5.5)          | -0.1 | -1.9  | 0.20                 | Ref.                  |
|               |                           | Decrease <0.9-4.4% | 43 | 4.6 (4.1, 5.2)          | 4.6 (4.0, 5.3)          | -0.0 | -0.4  | 0.57                 | 0.78                  |
|               |                           | Decrease > 4.4%    | 11 | 5.6 (4.0, 7.9)          | 5.3 (4.1, 6.8)          | -0.4 | -6.8  | 0.23                 | 0.53                  |
|               |                           |                    |    |                         |                         |      |       | (0.29 <sup>*</sup> ) | (0.74 <sup>**</sup> ) |
| Diet+Exercise | Estrone (pg/mL)           | CONTROL            | 80 | 32.0 (28.6, 35.8)       | 34.6 (31.4, 38.1)       | 2.6  | 8.1   | Ref.                 |                       |
|               |                           | Decrease <0.9%     | 12 | 46.1 (36.9, 57.7)       | 39.6 (31.2, 50.4)       | -6.5 | -14.1 | 0.006                | Ref.                  |
|               |                           | Decrease <0.9-4.4% | 31 | 37.3 (32.5, 42.8)       | 32.8 (29.3, 36.9)       | -4.5 | -12.0 | <0.001               | 0.77                  |
|               |                           | Decrease > 4.4%    | 65 | 31.2 (28.2, 34.4)       | 27.6 (25.0, 30.4)       | -3.6 | -11.5 | <0.0001              | 0.70                  |

| Group | Biomarker                        |                        | N  | Baseline<br>Geometric Mean<br>(95% CI) | 12-months<br>Geometric Mean<br>(95% CI) | $\Delta$ | % $\Delta$ | P-Value <sup>†</sup>    | P-value <sup>‡</sup>  |
|-------|----------------------------------|------------------------|----|----------------------------------------|-----------------------------------------|----------|------------|-------------------------|-----------------------|
|       |                                  |                        |    |                                        |                                         |          |            | (<0.0001 <sup>*</sup> ) | (0.72 <sup>**</sup> ) |
|       | Estradiol<br>(pg/mL)             | CONTROL                | 80 | 10.9<br>(9.6, 12.3)                    | 11.4<br>(10.2, 12.8)                    | 0.5      | 4.9        | Ref.                    |                       |
|       |                                  | Decrease <0.9%         | 12 | 15.3<br>(11.6, 20.2)                   | 13.6<br>(10.4, 17.9)                    | -1.7     | -10.9      | 0.08                    | Ref.                  |
|       |                                  | Decrease <0.9-<br>4.4% | 31 | 12.8<br>(11.1, 14.8)                   | 10.4<br>(9.0, 11.9)                     | -2.4     | -19.0      | <0.001                  | 0.30                  |
|       |                                  | Decrease > 4.4%        | 65 | 10.6<br>(9.5, 11.9)                    | 8.0<br>(7.2, 9.0)                       | -2.6     | -24.1      | <0.0001                 | 0.07                  |
|       |                                  |                        |    |                                        |                                         |          |            | (<0.0001 <sup>*</sup> ) | (0.07 <sup>**</sup> ) |
|       | Total<br>Testosterone<br>(ng/dL) | CONTROL                | 80 | 22.8<br>(20.2, 25.7)                   | 23.2<br>(20.8, 25.9)                    | 0.4      | 1.8        | Ref.                    |                       |
|       |                                  | Decrease <0.9%         | 12 | 32.1<br>(24.4, 42.3)                   | 27.6<br>(21.6, 35.4)                    | -4.5     | -14.0      | 0.15                    | Ref.                  |
|       |                                  | Decrease <0.9-<br>4.4% | 31 | 24.2<br>(21.3, 27.4)                   | 22.8<br>(20.2, 25.8)                    | -1.3     | -5.5       | 0.11                    | 0.43                  |
|       |                                  | Decrease > 4.4%        | 65 | 22.9<br>(20.7, 25.3)                   | 21.5<br>(19.4, 23.9)                    | -1.4     | -6.0       | 0.04                    | 0.45                  |
|       |                                  |                        |    |                                        |                                         |          |            | (0.05 <sup>*</sup> )    | (0.51 <sup>**</sup> ) |
|       | Androstenedione<br>(ng/mL)       | CONTROL                | 80 | 48.7<br>(43.9, 54.0)                   | 49.4<br>(45.4, 53.7)                    | 0.7      | 1.5        | Ref.                    |                       |
|       |                                  | Decrease <0.9%         | 12 | 68.7<br>(53.9, 87.5)                   | 51.2<br>(36.3, 72.0)                    | -        | -25.5      | 0.006                   | Ref.                  |
|       |                                  | Decrease <0.9-<br>4.4% | 31 | 49.1<br>(43.2, 55.7)                   | 50.9<br>(45.3, 57.1)                    | 1.8      | 3.6        | 0.75                    | 0.004                 |
|       |                                  | Decrease > 4.4%        | 65 | 53.3<br>(48.9, 58.2)                   | 50.6<br>(46.1, 55.6)                    | -2.7     | -5.0       | 0.25                    | 0.03                  |

| Group | Biomarker                    |                    | N  | Baseline<br>Geometric Mean<br>(95% CI) | 12-months<br>Geometric Mean<br>(95% CI) | $\Delta$ | % $\Delta$ | P-Value <sup>†</sup>    | P-value <sup>‡</sup>     |
|-------|------------------------------|--------------------|----|----------------------------------------|-----------------------------------------|----------|------------|-------------------------|--------------------------|
|       |                              |                    |    |                                        |                                         |          |            | (0.46 <sup>*</sup> )    | (0.24 <sup>**</sup> )    |
|       | SHBG<br>(nmol/L)             | CONTROL            | 80 | 34.7<br>(31.5, 38.2)                   | 33.7<br>(30.3, 37.5)                    | -0.9     | -2.7       | Ref.                    |                          |
|       |                              | Decrease <0.9%     | 12 | 34.1<br>(26.5, 43.9)                   | 35.7<br>(28.8, 44.2)                    | 1.6      | 4.6        | 0.09                    | Ref.                     |
|       |                              | Decrease <0.9-4.4% | 31 | 33.5<br>(29.6, 37.8)                   | 37.0<br>(33.0, 41.5)                    | 3.6      | 10.6       | <0.001                  | 0.27                     |
|       |                              | Decrease > 4.4%    | 65 | 35.2<br>(32.3, 38.3)                   | 47.5<br>(44.3, 51.0)                    | 12.3     | 35.0       | (<0.0001)               | (<0.0001)                |
|       |                              |                    |    |                                        |                                         |          |            | (<0.0001 <sup>*</sup> ) | (<0.0001 <sup>**</sup> ) |
|       | Free Estradiol<br>(pg/mL)    | CONTROL            | 80 | 0.30<br>(0.27, 0.34)                   | 0.32<br>(0.29, 0.36)                    | 0.02     | 6.3        | Ref.                    |                          |
|       |                              | Decrease <0.9%     | 12 | 0.42<br>(0.31, 0.56)                   | 0.37<br>(0.28, 0.48)                    | -0.05    | -11.7      | 0.06                    | Ref.                     |
|       |                              | Decrease <0.9-4.4% | 31 | 0.35<br>(0.30, 0.41)                   | 0.28<br>(0.24, 0.32)                    | 0.08     | -21.3      | <0.0001                 | 0.02                     |
|       |                              | Decrease > 4.4%    | 65 | 0.29<br>(0.25, 0.32)                   | 0.20<br>(0.18, 0.22)                    | 0.09     | -31.2      | <0.0001                 | 0.006                    |
|       |                              |                    |    |                                        |                                         |          |            | (<0.0001 <sup>*</sup> ) | (<0.01 <sup>**</sup> )   |
|       | Free Testosterone<br>(pg/mL) | CONTROL            | 80 | 4.9<br>(4.4, 5.6)                      | 5.1<br>(4.6, 5.7)                       | 0.1      | 2.6        | Ref.                    |                          |
|       |                              | Decrease <0.9%     | 12 | 7.0<br>(5.3, 9.4)                      | 6.0<br>(4.6, 7.7)                       | -1.1     | -15.3      | 0.10                    | Ref.                     |
|       |                              | Decrease <0.9-4.4% | 31 | 5.4<br>(4.8, 6.1)                      | 4.9<br>(4.3, 5.5)                       | -0.5     | -9.6       | 0.01                    | 0.59                     |

|       |           |                 |    | Baseline                | 12-months               |          |            |                         |                       |
|-------|-----------|-----------------|----|-------------------------|-------------------------|----------|------------|-------------------------|-----------------------|
| Group | Biomarker |                 | N  | Geometric Mean (95% CI) | Geometric Mean (95% CI) | $\Delta$ | % $\Delta$ | P-Value <sup>†</sup>    | P-value <sup>‡</sup>  |
|       |           | Decrease > 4.4% | 65 | 5.0 (4.5, 5.5)          | 4.0 (3.6, 4.5)          | -0.9     | -18.7      | <0.0001                 | 0.73                  |
|       |           |                 |    |                         |                         |          |            | (<0.0001 <sup>*</sup> ) | (0.32 <sup>**</sup> ) |

<sup>†</sup>Testing difference in change from baseline to 12 months in hormones compared to Controls.

<sup>‡</sup>Testing difference in change from baseline to 12 months in hormones compared to Weight Loss <5% Group, excluding Controls

<sup>\*</sup>Testing for a trend in change from baseline to 12 months in hormones from Controls through Weight Loss  $\geq$ 10% Group

<sup>\*\*</sup>Testing for a trend in change from baseline to 12 months in hormones from >5% Weight Loss Group through Weight Loss  $\geq$ 10% Group





| Group | Biomarker               |           | N  | Baseline Geometric Mean (95% CI) | 12-months Geometric Mean (95% CI) | $\Delta$ | % $\Delta$ | P-Value†                | P-value‡                |
|-------|-------------------------|-----------|----|----------------------------------|-----------------------------------|----------|------------|-------------------------|-------------------------|
|       |                         |           |    |                                  |                                   |          |            | (0.33 <sup>*</sup> )    | (0.67 <sup>**</sup> )   |
|       | Androstenedione (ng/mL) | CONTROL   | 80 | 0.49 (0.44, 0.54)                | 0.49 (0.45, 0.54)                 | 0.01     | 1.5        | Ref.                    |                         |
|       |                         | <84.3%    | 41 | 0.46 (0.41, 0.51)                | 0.44 (0.38, 0.52)                 | -0.01    | -2.8       | 0.39                    | Ref.                    |
|       |                         | 84.3-106% | 36 | 0.53 (0.47, 0.61)                | 0.55 (0.49, 0.63)                 | 0.02     | 3.8        | 0.72                    | 0.29                    |
|       |                         | >= 106%   | 38 | 0.55 (0.47, 0.65)                | 0.55 (0.48, 0.63)                 | 0        | -0.8       | 0.75                    | 0.68                    |
|       |                         |           |    |                                  |                                   |          |            | (0.93 <sup>*</sup> )    | (0.76 <sup>**</sup> )   |
|       | SHBG (nmol/L)           | CONTROL   | 80 | 34.7 (31.5, 38.2)                | 33.7 (30.3, 37.5)                 | -0.9     | -2.7       | Ref.                    |                         |
|       |                         | <84.3%    | 41 | 36.1 (31.5, 41.4)                | 39.9 (34.2, 46.5)                 | 3.8      | 10.5       | 0.02                    | Ref.                    |
|       |                         | 84.3-106% | 36 | 34.1 (29.3, 39.8)                | 42.7 (38.0, 48.0)                 | 8.6      | 25.1       | <0.0001                 | 0.004                   |
|       |                         | >= 106%   | 38 | 37.0 (32.4, 42.3)                | 48.1 (41.6, 55.6)                 | 11.0     | 29.8       | <0.0001                 | 0.0004                  |
|       |                         |           |    |                                  |                                   |          |            | (<0.0001 <sup>*</sup> ) | (<0.001 <sup>**</sup> ) |
|       | Free Estradiol (pg/mL)  | CONTROL   | 79 | 0.30 (0.27, 0.34)                | 0.32 (0.29, 0.36)                 | 0.02     | 6.3        | Ref.                    |                         |
|       |                         | <84.3%    | 41 | 0.34 (0.29, 0.39)                | 0.28 (0.23, 0.35)                 | -0.05    | -15.2      | 0.002                   | Ref.                    |
|       |                         | 84.3-106% | 36 | 0.31 (0.27, 0.36)                | 0.24 (0.21, 0.28)                 | -0.07    | -21.4      | <0.0001                 | 0.20                    |
|       |                         | >= 106%   | 38 | 0.28 (0.24, 0.34)                | 0.22 (0.18, 0.26)                 | -0.07    | -24.2      | <0.0001                 | 0.05                    |
|       |                         |           |    |                                  |                                   |          |            | (<0.0001 <sup>*</sup> ) | (0.05 <sup>**</sup> )   |

| Group         | Biomarker                 |           | N  | Baseline Geometric Mean (95% CI) | 12-months Geometric Mean (95% CI) | $\Delta$ | % $\Delta$ | P-Value†                | P-value‡              |
|---------------|---------------------------|-----------|----|----------------------------------|-----------------------------------|----------|------------|-------------------------|-----------------------|
|               | Free Testosterone (pg/mL) | CONTROL   | 80 | 4.9 (4.4, 5.6)                   | 5.1 (4.6, 5.7)                    | 0.1      | 2.6        | Ref.                    |                       |
|               |                           | <84.3%    | 41 | 5.0 (4.3, 5.8)                   | 4.8 (4.0, 5.8)                    | -0.2     | -4.1       | 0.003                   | Ref.                  |
|               |                           | 84.3-106% | 36 | 5.2 (4.5, 6.2)                   | 4.9 (4.2, 5.6)                    | -0.4     | -7.6       | 0.08                    | 0.76                  |
|               |                           | >= 106%   | 38 | 5.1 (4.3, 5.9)                   | 4.2 (3.6, 5.0)                    | -0.9     | -16.8      | <0.0001                 | 0.02                  |
|               |                           |           |    |                                  |                                   |          |            | (0.0001 <sup>*</sup> )  | (0.01 <sup>**</sup> ) |
| Diet+Exercise | Estrone (pg/mL)           | CONTROL   | 80 | 32.0 (28.6, 35.8)                | 34.6 (31.4, 38.1)                 | 2.6      | 8.1        | Ref.                    |                       |
|               |                           | <84.3%    | 33 | 36.9 (31.5, 43.1)                | 33.2 (28.2, 39.0)                 | -3.7     | -10.0      | 0.0005                  | Ref.                  |
|               |                           | 84.3-106% | 43 | 33.2 (29.6, 37.3)                | 29.8 (26.5, 33.5)                 | -3.4     | -10.3      | 0.0004                  | 0.38                  |
|               |                           | >= 106%   | 40 | 32.5 (28.5, 36.9)                | 28.8 (25.5, 32.6)                 | -3.6     | -11.2      | 0.0001                  | 0.47                  |
|               |                           |           |    |                                  |                                   |          |            | (0.0001 <sup>*</sup> )  | (0.52 <sup>**</sup> ) |
|               | Estradiol (pg/mL)         | CONTROL   | 80 | 10.9 (9.6, 12.3)                 | 11.4 (10.2, 12.8)                 | 0.5      | 4.9        | Ref.                    |                       |
|               |                           | <84.3%    | 33 | 12.6 (10.5, 15.1)                | 10.7 (8.8, 12.9)                  | -1.9     | -15.4      | 0.0003                  | Ref.                  |
|               |                           | 84.3-106% | 43 | 11.0 (9.8, 12.5)                 | 9.2 (8.1, 10.5)                   | -1.8     | -16.4      | 0.0001                  | 0.47                  |
|               |                           | >= 106%   | 40 | 11.2 (9.6, 13.0)                 | 8.3 (7.2, 9.7)                    | -2.9     | -25.8      | <0.0001                 | 0.44                  |
|               |                           |           |    |                                  |                                   |          |            | (<0.0001 <sup>*</sup> ) | (0.36 <sup>**</sup> ) |

| Group | Biomarker                  |           | N  | Baseline Geometric Mean (95% CI) | 12-months Geometric Mean (95% CI) | Δ     | %Δ   | P-Value†                | P-value‡              |
|-------|----------------------------|-----------|----|----------------------------------|-----------------------------------|-------|------|-------------------------|-----------------------|
|       | Total Testosterone (ng/dL) | CONTROL   | 80 | 22.8 (20.2, 25.7)                | 23.2 (20.8, 25.9)                 | 0.4   | 1.8  | Ref.                    |                       |
|       |                            | <84.3%    | 33 | 24.8 (20.9, 29.5)                | 22.8 (19.4, 26.7)                 | -2.1  | -8.3 | 0.02                    | Ref.                  |
|       |                            | 84.3-106% | 43 | 23.3 (20.8, 26.2)                | 22.8 (20.4, 25.3)                 | -0.6  | -2.5 | 0.30                    | 0.11                  |
|       |                            | >= 106%   | 40 | 23.8 (21.1, 26.9)                | 22.1 (19.1, 25.5)                 | -1.7  | -7.3 | 0.04                    | 0.42                  |
|       |                            |           |    |                                  |                                   |       |      | (0.08 <sup>*</sup> )    | (0.54 <sup>**</sup> ) |
|       | Androstenedione (ng/mL)    | CONTROL   | 80 | 0.49 (0.44, 0.54)                | 0.49 (0.45, 0.54)                 | 0.01  | 1.5  | Ref.                    |                       |
|       |                            | <84.3%    | 33 | 0.5 (0.43, 0.58)                 | 0.47 (0.39, 0.56)                 | -0.03 | -5.9 | 0.15                    | Ref.                  |
|       |                            | 84.3-106% | 43 | 0.53 (0.47, 0.59)                | 0.51 (0.46, 0.57)                 | -0.01 | -2.8 | 0.48                    | 0.39                  |
|       |                            | >= 106%   | 40 | 0.55 (0.50, 0.60)                | 0.53 (0.47, 0.59)                 | -0.02 | -3.9 | 0.42                    | 0.5                   |
|       |                            |           |    |                                  |                                   |       |      | (0.43 <sup>*</sup> )    | (0.56 <sup>**</sup> ) |
|       | SHBG (nmol/L)              | CONTROL   | 80 | 34.7 (31.5, 38.2)                | 33.7 (30.3, 37.5)                 | -0.9  | -2.7 | Ref.                    |                       |
|       |                            | <84.3%    | 33 | 32.6 (28.6, 37.2)                | 40.0 (34.9, 45.9)                 | 7.4   | 22.7 | 0.0001                  | Ref.                  |
|       |                            | 84.3-106% | 43 | 33.6 (30.4, 37.2)                | 40.6 (36.7, 45.0)                 | 7.0   | 21.0 | <0.0001                 | 0.62                  |
|       |                            | >= 106%   | 40 | 35.8 (32.0, 40.1)                | 47.4 (43.2, 51.9)                 | 11.5  | 32.2 | <0.0001                 | 0.03                  |
|       |                            |           |    |                                  |                                   |       |      | (<0.0001 <sup>*</sup> ) | (0.02 <sup>**</sup> ) |

| Group | Biomarker                 |           | N  | Baseline Geometric Mean (95% CI) | 12-months Geometric Mean (95% CI) | Δ     | %Δ    | P-Value†   | P-value‡ |
|-------|---------------------------|-----------|----|----------------------------------|-----------------------------------|-------|-------|------------|----------|
|       | Free Estradiol (pg/mL)    | CONTROL   | 80 | 0.30 (0.27, 0.34)                | 0.32 (0.29, 0.36)                 | 0.02  | 6.3   | Ref.       |          |
|       |                           | <84.3%    | 33 | 0.35 (0.29, 0.42)                | 0.28 (0.22, 0.34)                 | -0.07 | -20.5 | <0.0001    | Ref.     |
|       |                           | 84.3-106% | 43 | 0.30 (0.27, 0.34)                | 0.24 (0.21, 0.27)                 | -0.06 | -21.3 | <0.0001    | 0.60     |
|       |                           | >= 106%   | 40 | 0.30 (0.26, 0.36)                | 0.20 (0.17, 0.24)                 | -0.1  | -32.2 | <0.0001    | 0.25     |
|       |                           |           |    |                                  |                                   |       |       | (<0.0001*) | (0.20**) |
|       | Free Testosterone (pg/mL) | CONTROL   | 80 | 4.9 (4.4, 5.6)                   | 5.1 (4.6, 5.7)                    | 0.1   | 2.6   | Ref.       |          |
|       |                           | <84.3%    | 33 | 5.6 (4.7, 6.6)                   | 4.7 (4.0, 5.5)                    | -0.9  | -16.5 | 0.0007     | Ref.     |
|       |                           | 84.3-106% | 43 | 5.2 (4.6, 5.8)                   | 4.6 (4.1, 5.2)                    | -0.6  | -10.9 | 0.002      | 0.20     |
|       |                           | >= 106%   | 40 | 5.1 (4.5, 5.8)                   | 4.2 (3.6, 4.8)                    | -1.0  | -18.9 | <0.0001    | 0.94     |
|       |                           |           |    |                                  |                                   |       |       | (<0.0001*) | (0.74**) |

†Testing difference in change from baseline to 12 months in hormones compared to Controls.

‡Testing difference in change from baseline to 12 months in hormones compared to the lowest adherence Group, excluding Controls

\*Testing for a trend in change from baseline to 12 months in hormones from Controls through the highest adherence Group

\*\*Testing for a trend in change from baseline to 12 months in hormones from the lowest adherence Group through the highest adherence Group.

**Supplementary Table 4:** Change in sex hormone levels, stratified by percent change in absolute VO<sub>2</sub> MAX (L/min)

| Group    | Biomarker                  |                            | N  | Baseline Geometric Mean (95% CI) | 12-months Geometric Mean (95% CI) | Δ    | %Δ   | P-Value† | P-value‡ |
|----------|----------------------------|----------------------------|----|----------------------------------|-----------------------------------|------|------|----------|----------|
| Exercise | Estrone (pg/mL)            | CONTROL                    | 80 | 32.0 (28.6, 35.8)                | 34.6 (31.4, 38.1)                 | 2.6  | 8.1  | Ref.     |          |
|          |                            | Decrease or increase <3.5% | 24 | 32.7 (27.8, 38.4)                | 34.2 (29.6, 39.5)                 | 1.6  | 4.8  | 0.58     | Ref.     |
|          |                            | Increase <3.5-14.3%        | 37 | 34.1 (29.9, 38.8)                | 31.1 (27.5, 35.3)                 | -2.9 | -8.6 | 0.0024   | 0.01     |
|          |                            | Increase > 14.3%           | 31 | 35.2 (30.8, 40.1)                | 34.6 (30.3, 39.4)                 | -0.6 | -1.7 | 0.14     | 0.31     |
|          |                            |                            |    |                                  |                                   |      |      | (0.02*)  | (0.41**) |
|          | Estradiol (pg/mL)          | CONTROL                    | 80 | 10.9 (9.6-12.3)                  | 11.4 (10.2, 12.8)                 | 0.5  | 4.9  | Ref.     |          |
|          |                            | Decrease or increase <3.5% | 24 | 11.7 (9.9,13.9)                  | 11.5 (9.8, 13.5)                  | -0.2 | -1.5 | 0.32     | Ref.     |
|          |                            | Increase <3.5-14.3%        | 37 | 10.6 (9.2, 12.3)                 | 10.3 (9.1, 11.7)                  | -0.3 | -3.2 | 0.23     | 0.73     |
|          |                            | Increase > 14.3%           | 31 | 11.6 (9.9, 13.6)                 | 11.1 (9.4,13.1)                   | -0.5 | -4.2 | 0.28     | 0.68     |
|          |                            |                            |    |                                  |                                   |      |      | (0.20*)  | (0.70**) |
|          | Total Testosterone (ng/dL) | CONTROL                    | 80 | 22.8 (20.2, 25.7)                | 23.2 (20.8, 25.9)                 | 0.4  | 1.8  | Ref.     |          |
|          |                            | Decrease or increase <3.5% | 24 | 20.1 (17.2, 23.4)                | 21.1 (17.3, 25.9)                 | 1.1  | 5.4  | 0.68     | Ref.     |

| Group | Biomarker                  |                               | N  | Baseline<br>Geometric<br>Mean<br>(95% CI) | 12-months<br>Geometric<br>Mean<br>(95% CI) | $\Delta$ | % $\Delta$ | P-Value†             | P-value‡              |
|-------|----------------------------|-------------------------------|----|-------------------------------------------|--------------------------------------------|----------|------------|----------------------|-----------------------|
|       |                            | Increase <3.5-14.3%           | 37 | 25.6<br>(22.9, 28.8)                      | 25.0<br>(22.1, 28.3)                       | -0.7     | -2.6       | 0.34                 | 0.33                  |
|       |                            | Increase > 14.3%              | 31 | 26.0<br>(22.5, 30.1)                      | 24.7<br>(20.9, 29.2)                       | -1.3     | -5.0       | 0.19                 | 0.22                  |
|       |                            |                               |    |                                           |                                            |          |            | (0.14 <sup>*</sup> ) | (0.22 <sup>**</sup> ) |
|       | Androstenedione<br>(ng/mL) | CONTROL                       | 80 | 0.49<br>(0.44, 0.54)                      | 0.49<br>(0.45, 0.54)                       | 0.01     | 1.5        | Ref.                 |                       |
|       |                            | Decrease or<br>increase <3.5% | 24 | 0.44<br>(0.4, 0.48)                       | 0.49<br>(0.43, 0.56)                       | 0.05     | 11.2       | 0.14                 | Ref.                  |
|       |                            | Increase <3.5-14.3%           | 37 | 0.51<br>(0.44, 0.59)                      | 0.5<br>(0.44, 0.57)                        | -0.01    | -1.8       | 0.58                 | 0.05                  |
|       |                            | Increase > 14.3%              | 31 | 0.55<br>(0.47, 0.63)                      | 0.55<br>(0.47, 0.65)                       | 0        | 0.6        | 0.88                 | 0.13                  |
|       |                            |                               |    |                                           |                                            |          |            | (0.68 <sup>*</sup> ) | (0.17 <sup>**</sup> ) |
|       | SHBG<br>(nmol/L)           | CONTROL                       | 80 | 34.7<br>(31.5, 38.2)                      | 33.7<br>(30.3, 37.5)                       | -0.9     | -2.7       | Ref.                 |                       |
|       |                            | Decrease or<br>increase <3.5% | 24 | 35.4<br>(29.7, 42.2)                      | 34.9<br>(29.4, 41.3)                       | -0.5     | -1.4       | 0.72                 | Ref.                  |
|       |                            | Increase <3.5-14.3%           | 37 | 38.4<br>(33.4, 44.2)                      | 37.8<br>(32.9, 43.4)                       | -0.6     | -1.6       | 0.64                 | 0.97                  |
|       |                            | Increase > 14.3%              | 31 | 42.6<br>(35.9, 50.5)                      | 42.5<br>(35.7, 50.7)                       | -0.08    | -0.2       | 0.42                 | 0.81                  |
|       |                            |                               |    |                                           |                                            |          |            | (0.42 <sup>*</sup> ) | (0.79 <sup>**</sup> ) |
|       | Free Estradiol<br>(pg/mL)  | CONTROL                       | 79 | 0.30<br>(0.27, 0.34)                      | 0.32<br>(0.29, 0.36)                       | 0.02     | 6.3        | Ref.                 |                       |

| Group         | Biomarker                       |                               | N  | Baseline<br>Geometric<br>Mean<br>(95% CI) | 12-months<br>Geometric<br>Mean<br>(95% CI) | $\Delta$ | % $\Delta$ | P-Value†  | P-value‡ |
|---------------|---------------------------------|-------------------------------|----|-------------------------------------------|--------------------------------------------|----------|------------|-----------|----------|
|               |                                 | Decrease or<br>increase <3.5% | 24 | 0.31<br>(0.26, 0.38)                      | 0.31<br>(0.26, 0.37)                       | 0        | -0.9       | 0.3       | Ref.     |
|               |                                 | Increase <3.5-<br>14.3%       | 37 | 0.28<br>(0.24, 0.33)                      | 0.27<br>(0.23, 0.31)                       | -0.01    | -2.6       | 0.24      | 0.72     |
|               |                                 | Increase > 14.3%              | 31 | 0.29<br>(0.24, 0.35)                      | 0.28<br>(0.23, 0.34)                       | -0.01    | -4.3       | 0.26      | 0.61     |
|               |                                 |                               |    |                                           |                                            |          |            | (0.18*)   | (0.62**) |
|               | Free<br>Testosterone<br>(pg/mL) | CONTROL                       | 80 | 4.9<br>(4.4, 5.6)                         | 5.1<br>(4.6, 5.7)                          | 0.1      | 2.6        | Ref.      |          |
|               |                                 | Decrease or<br>increase <3.5% | 24 | 4.3<br>(3.6, 5.1)                         | 4.6<br>(3.8, 5.6)                          | 0.3      | 6.4        | 0.69      | Ref.     |
|               |                                 | Increase <3.5-<br>14.3%       | 37 | 5.3<br>(4.7, 6.0)                         | 5.2<br>(4.6, 5.9)                          | -0.1     | -1.8       | 0.33      | 0.31     |
|               |                                 | Increase > 14.3%              | 31 | 5.1<br>(4.4, 5.9)                         | 4.8<br>(4.1, 5.7)                          | -0.3     | -5.1       | 0.12      | 0.15     |
|               |                                 |                               |    |                                           |                                            |          |            | (0.10*)   | (0.16**) |
| Diet+Exercise | Estrone<br>(pg/mL)              | CONTROL                       | 80 | 32.0<br>(28.6, 35.8)                      | 34.6<br>(31.4, 38.1)                       | 2.6      | 8.1        | Ref.      |          |
|               |                                 | Decrease or<br>increase <3.5% | 41 | 35.5<br>(31.5, 40.0)                      | 30.4<br>(26.8, 34.4)                       | -5.1     | -14.4      | <0.0001   | Ref.     |
|               |                                 | Increase <3.5-<br>14.3%       | 32 | 32.7<br>(27.9, 38.3)                      | 29.6<br>(25.6, 34.3)                       | -3.1     | -9.4       | 0.001     | 0.22     |
|               |                                 | Increase > 14.3%              | 31 | 33.6<br>(29.2, 38.7)                      | 30.5<br>(26.5, 35.2)                       | -3.2     | -9.4       | 0.002     | 0.26     |
|               |                                 |                               |    |                                           |                                            |          |            | (<0.001*) | (0.23**) |



| Group | Biomarker                        |                               | N  | Baseline<br>Geometric<br>Mean<br>(95% CI) | 12-months<br>Geometric<br>Mean<br>(95% CI) | $\Delta$ | % $\Delta$ | P-Value†  | P-value‡ |
|-------|----------------------------------|-------------------------------|----|-------------------------------------------|--------------------------------------------|----------|------------|-----------|----------|
|       | Estradiol<br>(pg/mL)             | CONTROL                       | 80 | 10.9<br>(9.6, 12.3)                       | 11.4<br>(10.2, 12.8)                       | 0.5      | 4.9        | Ref.      |          |
|       |                                  | Decrease or<br>increase <3.5% | 41 | 11.9<br>(10.3, 13.8)                      | 8.7<br>(7.5, 10.2)                         | -3.2     | -26.9      | <0.0001   | Ref.     |
|       |                                  | Increase <3.5-<br>14.3%       | 32 | 10.6<br>(9.0, 12.4)                       | 8.4<br>(7.2, 10.0)                         | -2.1     | -20.1      | <0.0001   | 0.23     |
|       |                                  | Increase > 14.3%              | 31 | 12.3<br>(10.5, 14.4)                      | 10.6<br>(9.1, 12.4)                        | -1.7     | -13.7      | 0.006     | 0.05     |
|       |                                  |                               |    |                                           |                                            |          |            | (<0.001*) | (0.05**) |
|       | Total<br>Testosterone<br>(ng/dL) | CONTROL                       | 80 | 22.8<br>(20.2, 25.7)                      | 23.2<br>(20.8, 25.9)                       | 0.4      | 1.8        | Ref.      |          |
|       |                                  | Decrease or<br>increase <3.5% | 41 | 24.6<br>(21.7, 27.9)                      | 22.6<br>(20.0, 25.6)                       | -2.0     | -8.1       | 0.02      | Ref.     |
|       |                                  | Increase <3.5-<br>14.3%       | 32 | 22.6<br>(19.8, 25.8)                      | 20.5<br>(17.7, 23.7)                       | -2.1     | -9.4       | 0.007     | 0.76     |
|       |                                  | Increase > 14.3%              | 31 | 23.3<br>(20.4, 26.7)                      | 23.9<br>(20.7, 27.6)                       | 0.6      | 2.7        | 0.90      | 0.025    |
|       |                                  |                               |    |                                           |                                            |          |            | (0.48*)   | (0.04**) |
|       | Androstenedione<br>(ng/mL)       | CONTROL                       | 80 | 0.49<br>(0.44, 0.54)                      | 0.49<br>(0.45, 0.54)                       | 0.01     | 1.5        | Ref.      |          |
|       |                                  | Decrease or<br>increase <3.5% | 41 | 0.54<br>(0.48, 0.61)                      | 0.49<br>(0.44, 0.56)                       | -0.05    | -9.0       | 0.11      | Ref.     |
|       |                                  | Increase <3.5-<br>14.3%       | 32 | 0.51<br>(0.45, 0.58)                      | 0.48<br>(0.43, 0.54)                       | -0.03    | -6.5       | 0.19      | 0.71     |

| Group | Biomarker                       |                               | N  | Baseline<br>Geometric<br>Mean<br>(95% CI) | 12-months<br>Geometric<br>Mean<br>(95% CI) | $\Delta$ | % $\Delta$ | P-Value†                           | P-value‡                      |
|-------|---------------------------------|-------------------------------|----|-------------------------------------------|--------------------------------------------|----------|------------|------------------------------------|-------------------------------|
|       |                                 | Increase > 14.3%              | 31 | 0.54<br>(0.48, 0.62)                      | 0.57<br>(0.48, 0.66)                       | 0.02     | 4.3        | 0.72<br>(0.95 <sup>*</sup> )       | 0.09<br>(0.10 <sup>**</sup> ) |
|       | SHBG<br>(nmol/L)                | CONTROL                       | 80 | 34.7<br>(31.5, 38.2)                      | 33.7<br>(30.3, 37.5)                       | -0.9     | -2.7       | Ref.                               |                               |
|       |                                 | Decrease or<br>increase <3.5% | 41 | 34.8<br>(31.5, 38.6)                      | 41.2<br>(36.9, 45.9)                       | 6.3      | 18.1       | <0.0001                            | Ref.                          |
|       |                                 | Increase <3.5-<br>14.3%       | 32 | 34.0<br>(29.9, 38.8)                      | 43.3<br>(38.5, 48.8)                       | 9.3      | 27.4       | <0.0001                            | 0.15                          |
|       |                                 | Increase > 14.3%              | 31 | 33.3<br>(29.2, 38.0)                      | 43.4<br>(39.1, 48.3)                       | 10.1     | 30.4       | <0.0001<br>(<0.0001 <sup>†</sup> ) | 0.07<br>(0.06 <sup>**</sup> ) |
|       | Free Estradiol<br>(pg/mL)       | CONTROL                       | 79 | 0.30<br>(0.27, 0.34)                      | 0.32<br>(0.29, 0.36)                       | 0.02     | 6.3        | Ref.                               |                               |
|       |                                 | Decrease or<br>increase <3.5% | 41 | 0.32<br>(0.28, 0.38)                      | 0.22<br>(0.19, 0.26)                       | -0.1     | -30.8      | <0.0001                            | Ref.                          |
|       |                                 | Increase <3.5-<br>14.3%       | 32 | 0.29<br>(0.24, 0.34)                      | 0.21<br>(0.18, 0.26)                       | -0.07    | -26.0      | <0.0001                            | 0.40                          |
|       |                                 | Increase > 14.3%              | 31 | 0.34<br>(0.28, 0.40)                      | 0.27<br>(0.23, 0.32)                       | -0.07    | -20.4      | 0.0001<br>(<0.0001 <sup>†</sup> )  | 0.11<br>(0.12 <sup>**</sup> ) |
|       | Free<br>Testosterone<br>(pg/mL) | CONTROL                       | 80 | 4.9<br>(4.4, 5.6)                         | 5.1<br>(4.6, 5.7)                          | 0.1      | 2.6        | Ref.                               |                               |
|       |                                 | Decrease or<br>increase <3.5% | 41 | 5.4<br>(4.8, 6.0)                         | 4.6<br>(4.0, 5.1)                          | -0.8     | -15.4      | <0.0001                            | Ref.                          |

| Group | Biomarker |                         | N  | Baseline<br>Geometric<br>Mean<br>(95% CI) | 12-months<br>Geometric<br>Mean<br>(95% CI) | $\Delta$ | % $\Delta$ | P-Value†  | P-value‡ |
|-------|-----------|-------------------------|----|-------------------------------------------|--------------------------------------------|----------|------------|-----------|----------|
|       |           | Increase <3.5-<br>14.3% | 32 | 5.0<br>(4.4, 5.7)                         | 4.0<br>(3.4, 4.7)                          | -1.0     | -19.2      | <0.0001   | 0.35     |
|       |           | Increase > 14.3%        | 31 | 5.2<br>(4.4, 6.1)                         | 4.7<br>(4.0, 5.5)                          | -0.5     | -9.0       | 0.01      | 0.16     |
|       |           |                         |    |                                           |                                            |          |            | (<0.001*) | (0.21**) |

†Testing difference in change from baseline to 12 months in hormones compared to Controls.

‡Testing difference in change from baseline to 12 months in hormones compared to Decrease or Increase <3.5% Group, excluding Controls

\*Testing for a trend in change from baseline to 12 months in hormones from Controls through increase  $\geq$  14.3% Group

\*\*Testing for a trend in change from baseline to 12 months in hormones from Decrease or Increase <3.5% Group through Increase  $\geq$  14.3% Group.

**Supplementary Table 5:** Change in sex hormone levels, stratified by change in steps/day

| Group                   | Biomarker                        |                        | N  | Baseline<br>Geometric<br>Mean<br>(95% CI) | 12-months<br>Geometric<br>Mean<br>(95% CI) | $\Delta$ | % $\Delta$ | P-Value†             | P-value‡              |
|-------------------------|----------------------------------|------------------------|----|-------------------------------------------|--------------------------------------------|----------|------------|----------------------|-----------------------|
| Exercise<br>(steps/day) | Estrone<br>(pg/mL)               | CONTROL                | 80 | 32.0<br>(28.6, 35.8)                      | 34.6<br>(31.4, 38.1)                       | 2.6      | 8.1        | Ref.                 |                       |
|                         |                                  | <2000 steps/day        | 26 | 33.7<br>(29.2, 38.9)                      | 33.1<br>(28.5, 38.4)                       | -0.6     | -1.9       | 0.11                 | Ref.                  |
|                         |                                  | 2000-5000<br>steps/day | 35 | 33.2<br>(28.9, 38.1)                      | 32.0<br>(27.9, 36.8)                       | -1.1     | -3.4       | 0.03                 | 0.77                  |
|                         |                                  | >5000 steps/day        | 21 | 34.1<br>(28.8, 40.5)                      | 35.1<br>(30.3, 40.7)                       | 1.0      | 2.9        | 0.48                 | 0.49                  |
|                         |                                  |                        |    |                                           |                                            |          |            | (0.15 <sup>†</sup> ) | (0.52 <sup>**</sup> ) |
|                         | Estradiol<br>(pg/mL)             | CONTROL                | 80 | 10.9<br>(9.6-12.3)                        | 11.4<br>(10.2, 12.8)                       | 0.5      | 4.9        | Ref.                 |                       |
|                         |                                  | <2000 steps/day        | 26 | 11.3<br>(9.6,13.3)                        | 11.4<br>(9.9, 13.2)                        | 0.1      | 1.0        | 0.67                 | Ref.                  |
|                         |                                  | 2000-5000<br>steps/day | 35 | 11.3<br>(9.6, 13.3)                       | 10.7<br>(9.2, 12.5)                        | -0.6     | -5.5       | 0.10                 | 0.26                  |
|                         |                                  | >5000 steps/day        | 21 | 10.0<br>(8.3, 12.1)                       | 10.1<br>(8.3,12.3)                         | 0.09     | 0.9        | 0.71                 | 0.99                  |
|                         |                                  |                        |    |                                           |                                            |          |            | (0.31 <sup>†</sup> ) | (0.93 <sup>**</sup> ) |
|                         | Total<br>Testosterone<br>(ng/dL) | CONTROL                | 80 | 22.8<br>(20.2, 25.7)                      | 23.2<br>(20.8, 25.9)                       | 0.4      | 1.8        | Ref.                 |                       |
|                         |                                  | <2000 steps/day        | 26 | 24.9<br>(21.9, 28.3)                      | 25.3<br>(22.3, 28.7)                       | 0.4      | 1.7        | 0.95                 | Ref.                  |

| Group | Biomarker                  |                        | N  | Baseline<br>Geometric<br>Mean<br>(95% CI) | 12-months<br>Geometric<br>Mean<br>(95% CI) | Δ     | %Δ   | P-Value†             | P-value‡               |
|-------|----------------------------|------------------------|----|-------------------------------------------|--------------------------------------------|-------|------|----------------------|------------------------|
|       |                            | 2000-5000<br>steps/day | 35 | 24.3<br>(21.0, 28.3)                      | 24.8<br>(21.0, 29.3)                       | 0.5   | 2.0  | 1.0                  | 0.96                   |
|       |                            | >5000 steps/day        | 21 | 25.3<br>(21.3, 30.0)                      | 24.6<br>(21.0, 28.9)                       | -0.6  | -2.6 | 0.37                 | 0.51                   |
|       |                            |                        |    |                                           |                                            |       |      | (0.56 <sup>†</sup> ) | (0.53 <sup>**</sup> )  |
|       | Androstenedione<br>(ng/mL) | CONTROL                | 80 | 0.49<br>(0.44, 0.54)                      | 0.49<br>(0.45, 0.54)                       | 0.01  | 1.5  | Ref.                 |                        |
|       |                            | <2000 steps/day        | 26 | 0.53<br>(0.44, 0.63)                      | 0.54<br>(0.45, 0.65)                       | 0.01  | 1.9  | 0.97                 | Ref.                   |
|       |                            | 2000-5000<br>steps/day | 35 | 0.48<br>(0.43, 0.54)                      | 0.47<br>(0.42, 0.53)                       | -0.01 | -1.3 | 0.61                 | 0.67                   |
|       |                            | >5000 steps/day        | 21 | 0.56<br>(0.49, 0.65)                      | 0.59<br>(0.51, 0.69)                       | 0.03  | 4.7  | 0.67                 | 0.75                   |
|       |                            |                        |    |                                           |                                            |       |      | (0.95 <sup>†</sup> ) | (0.79 <sup>**</sup> )  |
|       | SHBG<br>(nmol/L)           | CONTROL                | 80 | 34.7<br>(31.5, 38.2)                      | 33.7<br>(30.3, 37.5)                       | -0.9  | -2.7 | Ref.                 |                        |
|       |                            | <2000 steps/day        | 26 | 42.9<br>(34.5, 53.4)                      | 40.7<br>(33.1, 50.1)                       | -2.2  | -5.0 | 0.56                 | Ref.                   |
|       |                            | 2000-5000<br>steps/day | 35 | 42.6<br>(37.8, 47.9)                      | 43.1<br>(38.1, 48.8)                       | 0.5   | 1.2  | 0.17                 | 0.06                   |
|       |                            | >5000 steps/day        | 21 | 35.1<br>(29.2, 42.2)                      | 37.7<br>(31.4, 45.3)                       | 2.7   | 7.6  | 0.01                 | 0.003                  |
|       |                            |                        |    |                                           |                                            |       |      | (0.01 <sup>†</sup> ) | (<0.01 <sup>**</sup> ) |
|       | Free Estradiol<br>(pg/mL)  | CONTROL                | 79 | 0.30<br>(0.27, 0.34)                      | 0.32<br>(0.29, 0.36)                       | 0.02  | 6.3  | Ref.                 |                        |
|       |                            | <2000 steps/day        | 26 | 0.28<br>(0.23, 0.34)                      | 0.29<br>(0.24, 0.35)                       | 0.01  | 3.2  | 0.94                 | Ref.                   |

| Group                        | Biomarker                       |                        | N  | Baseline<br>Geometric<br>Mean<br>(95% CI) | 12-months<br>Geometric<br>Mean<br>(95% CI) | Δ     | %Δ    | P-Value†               | P-value‡              |
|------------------------------|---------------------------------|------------------------|----|-------------------------------------------|--------------------------------------------|-------|-------|------------------------|-----------------------|
|                              |                                 | 2000-5000<br>steps/day | 35 | 0.29<br>(0.24, 0.34)                      | 0.27<br>(0.23, 0.32)                       | -0.02 | -6.1  | 0.07                   | 0.11                  |
|                              |                                 | >5000 steps/day        | 21 | 0.27<br>(0.22, 0.34)                      | 0.27<br>(0.21, 0.34)                       | 0     | -1.3  | 0.51                   | 0.57                  |
|                              |                                 |                        |    |                                           |                                            |       |       | (0.18 <sup>†</sup> )   | (0.51 <sup>**</sup> ) |
|                              | Free<br>Testosterone<br>(pg/mL) | CONTROL                | 80 | 4.9<br>(4.4, 5.6)                         | 5.1<br>(4.6, 5.7)                          | 0.1   | 2.6   | Ref.                   |                       |
|                              |                                 | <2000 steps/day        | 26 | 4.8<br>(4.3, 5.4)                         | 5.0<br>(4.4, 5.7)                          | 0.2   | 4.8   | 0.79                   | Ref.                  |
|                              |                                 | 2000-5000<br>steps/day | 35 | 4.8<br>(4.2, 5.6)                         | 4.9<br>(4.2, 5.7)                          | 0.06  | 1.3   | 0.76                   | 0.63                  |
|                              |                                 | >5000 steps/day        | 21 | 5.5<br>(4.6, 6.6)                         | 5.2<br>(4.4, 6.1)                          | -0.3  | -5.8  | 0.08                   | 0.08                  |
|                              |                                 |                        |    |                                           |                                            |       |       | (0.20 <sup>†</sup> )   | (0.09 <sup>**</sup> ) |
| Diet+Exercise<br>(steps/day) | Estrone<br>(pg/mL)              | CONTROL                | 80 | 32.0<br>(28.6, 35.8)                      | 34.6<br>(31.4, 38.1)                       | 2.6   | 8.1   | Ref.                   |                       |
|                              |                                 | <2000 steps/day        | 24 | 34.5<br>(29.7, 40.1)                      | 30.1<br>(25.1, 36.0)                       | -4.4  | -12.9 | 0.0006                 | Ref.                  |
|                              |                                 | 2000-5000<br>steps/day | 36 | 34.2<br>(29.4, 39.8)                      | 29.4<br>(25.5, 33.8)                       | -4.9  | -14.3 | <0.0001                | 0.78                  |
|                              |                                 | >5000 steps/day        | 38 | 32.9<br>(29.0, 37.4)                      | 30.5<br>(27.1, 34.3)                       | -2.4  | -7.3  | 0.003                  | 0.28                  |
|                              |                                 |                        |    |                                           |                                            |       |       | (0.0004 <sup>†</sup> ) | (0.21 <sup>**</sup> ) |
|                              | Estradiol<br>(pg/mL)            | CONTROL                | 80 | 10.9<br>(9.6, 12.3)                       | 11.4<br>(10.2, 12.8)                       | 0.5   | 4.9   | Ref.                   |                       |

| Group | Biomarker                        |                        | N  | Baseline<br>Geometric<br>Mean<br>(95% CI) | 12-months<br>Geometric<br>Mean<br>(95% CI) | Δ     | %Δ    | P-Value†               | P-value‡              |
|-------|----------------------------------|------------------------|----|-------------------------------------------|--------------------------------------------|-------|-------|------------------------|-----------------------|
|       |                                  | <2000 steps/day        | 24 | 11.6<br>(9.8, 13.8)                       | 9.0<br>(7.5, 10.8)                         | -2.6  | -22.5 | <0.0001                | Ref.                  |
|       |                                  | 2000-5000<br>steps/day | 36 | 12.6<br>(10.9, 14.6)                      | 9.7<br>(8.3, 11.4)                         | -2.9  | -23.0 | <0.0001                | 0.92                  |
|       |                                  | >5000 steps/day        | 38 | 10.7<br>(9.1, 12.5)                       | 8.6<br>(7.4, 9.9)                          | -2.1  | -19.7 | 0.002                  | 0.69                  |
|       |                                  |                        |    |                                           |                                            |       |       | (0.0001 <sup>†</sup> ) | (0.67 <sup>**</sup> ) |
|       | Total<br>Testosterone<br>(ng/dL) | CONTROL                | 80 | 22.8<br>(20.2, 25.7)                      | 23.2<br>(20.8, 25.9)                       | 0.4   | 1.8   | Ref.                   |                       |
|       |                                  | <2000 steps/day        | 24 | 22.9<br>(19.9, 26.5)                      | 21.4<br>(18.7, 24.6)                       | -1.5  | -6.6  | 0.12                   | Ref.                  |
|       |                                  | 2000-5000<br>steps/day | 36 | 24.2<br>(21.2, 27.6)                      | 22.3<br>(19.4, 25.6)                       | -1.9  | -7.9  | 0.02                   | 0.82                  |
|       |                                  | >5000 steps/day        | 38 | 23.3<br>(20.4, 26.7)                      | 23.0<br>(19.9, 26.6)                       | -0.4  | -1.5  | 0.43                   | 0.36                  |
|       |                                  |                        |    |                                           |                                            |       |       | (0.20 <sup>†</sup> )   | (0.29 <sup>**</sup> ) |
|       | Androstenedione<br>(ng/mL)       | CONTROL                | 80 | 0.49<br>(0.44, 0.54)                      | 0.49<br>(0.45, 0.54)                       | 0.01  | 1.5   | Ref.                   |                       |
|       |                                  | <2000 steps/day        | 24 | 0.54<br>(0.45, 0.64)                      | 0.49<br>(0.41, 0.60)                       | -0.04 | -8.1  | 0.25                   | Ref.                  |
|       |                                  | 2000-5000<br>steps/day | 36 | 0.50<br>(0.44, 0.56)                      | 0.48<br>(0.42, 0.55)                       | -0.01 | -2.7  | 0.51                   | 0.54                  |
|       |                                  | >5000 steps/day        | 38 | 0.57<br>(0.50, 0.63)                      | 0.54<br>(0.49, 0.60)                       | -0.02 | -4.3  | 0.39                   | 0.67                  |
|       |                                  |                        |    |                                           |                                            |       |       | (0.39 <sup>†</sup> )   | (0.71 <sup>**</sup> ) |

| Group | Biomarker                       |                        | N  | Baseline<br>Geometric<br>Mean<br>(95% CI) | 12-months<br>Geometric<br>Mean<br>(95% CI) | Δ     | %Δ    | P-Value†                | P-value‡                 |
|-------|---------------------------------|------------------------|----|-------------------------------------------|--------------------------------------------|-------|-------|-------------------------|--------------------------|
|       | SHBG<br>(nmol/L)                | CONTROL                | 80 | 34.7<br>(31.5, 38.2)                      | 33.7<br>(30.3, 37.5)                       | -0.9  | -2.7  | Ref.                    |                          |
|       |                                 | <2000 steps/day        | 24 | 33.8<br>(28.4, 40.3)                      | 37.6<br>(32.4, 43.7)                       | 3.8   | 11.2  | 0.005                   | Ref.                     |
|       |                                 | 2000-5000<br>steps/day | 36 | 36.2<br>(32.8, 40.1)                      | 44.2<br>(40.0, 48.8)                       | 7.9   | 21.9  | <0.0001                 | 0.09                     |
|       |                                 | >5000 steps/day        | 38 | 32.8<br>(29.6, 36.4)                      | 45.3<br>(41.3, 49.7)                       | 12.4  | 37.9  | <0.0001                 | 0.0002                   |
|       |                                 |                        |    |                                           |                                            |       |       | (<0.0001 <sup>†</sup> ) | (<0.0001 <sup>**</sup> ) |
|       | Free Estradiol<br>(pg/mL)       | CONTROL                | 79 | 0.30<br>(0.27, 0.34)                      | 0.32<br>(0.29, 0.36)                       | 0.02  | 6.3   | Ref.                    |                          |
|       |                                 | <2000 steps/day        | 24 | 0.32<br>(0.26, 0.38)                      | 0.24<br>(0.19, 0.29)                       | -0.08 | -24.6 | <0.0001                 | Ref.                     |
|       |                                 | 2000-5000<br>steps/day | 36 | 0.34<br>(0.29, 0.40)                      | 0.25<br>(0.21, 0.29)                       | -0.1  | -27.9 | <0.0001                 | 0.54                     |
|       |                                 | >5000 steps/day        | 38 | 0.30<br>(0.25, 0.35)                      | 0.21<br>(0.18, 0.25)                       | -0.08 | -27.5 | <0.0001                 | 0.68                     |
|       |                                 |                        |    |                                           |                                            |       |       | (<0.0001 <sup>†</sup> ) | (0.72 <sup>**</sup> )    |
|       | Free<br>Testosterone<br>(pg/mL) | CONTROL                | 80 | 4.9<br>(4.4, 5.6)                         | 5.1<br>(4.6, 5.7)                          | 0.1   | 2.6   | Ref.                    |                          |
|       |                                 | <2000 steps/day        | 24 | 5.0<br>(4.5, 5.7)                         | 4.5<br>(4.0, 5.1)                          | -0.5  | -10.6 | 0.001                   | Ref.                     |
|       |                                 | 2000-5000<br>steps/day | 36 | 5.2<br>(4.5, 6.0)                         | 4.4<br>(3.7, 5.1)                          | -0.9  | -16.4 | <0.0001                 | 0.27                     |
|       |                                 | >5000 steps/day        | 38 | 5.3<br>(4.6, 6.0)                         | 4.4<br>(3.8, 5.2)                          | -0.8  | -15.5 | <0.0001                 | 0.32                     |



| Group | Biomarker |  | N | Baseline Geometric Mean (95% CI) | 12-months Geometric Mean (95% CI) | $\Delta$ | % $\Delta$ | P-Value†                | P-value‡              |
|-------|-----------|--|---|----------------------------------|-----------------------------------|----------|------------|-------------------------|-----------------------|
|       |           |  |   |                                  |                                   |          |            | (<0.0001 <sup>†</sup> ) | (0.37 <sup>**</sup> ) |

<sup>†</sup>Testing difference in change from baseline to 12 months in hormones compared to Controls.

<sup>‡</sup>Testing difference in change from baseline to 12 months in hormones compared to <2000 Steps/Day Group, excluding Controls

<sup>\*</sup>Testing for a trend in change from baseline to 12 months in hormones from Controls through > 5000 Steps/Day Group

<sup>\*\*</sup>Testing for a trend in change from baseline to 12 months in hormones from <2000 Steps/Day Group through > 5000 Steps/Day Group.



| Group | Biomarker               |                 | N  | Baseline Geometric Mean (95% CI) | 12-months Geometric Mean (95% CI) | $\Delta$ | % $\Delta$ | P-Value†             | P-value‡              |
|-------|-------------------------|-----------------|----|----------------------------------|-----------------------------------|----------|------------|----------------------|-----------------------|
|       |                         |                 |    |                                  |                                   |          |            | (0.50 <sup>†</sup> ) | (0.39 <sup>**</sup> ) |
|       | Androstenedione (ng/mL) | CONTROL         | 80 | 0.49 (0.44, 0.54)                | 0.49 (0.45, 0.54)                 | 0.01     | 1.5        | Ref.                 |                       |
|       |                         | <= 154 mins/wk  | 38 | 0.48 (0.43, 0.55)                | 0.44 (0.38, 0.51)                 | -0.04    | -8.4       | 0.46                 | Ref.                  |
|       |                         | 154-196 mins/wk | 38 | 0.49 (0.43, 0.57)                | 0.49 (0.42, 0.57)                 | -0.01    | -1.1       | 0.67                 | 0.81                  |
|       |                         | >196 mins/wk    | 34 | 0.53 (0.47, 0.60)                | 0.56 (0.49, 0.63)                 | 0.02     | 4.0        | 0.69                 | 0.31                  |
|       |                         |                 |    |                                  |                                   |          |            | (0.85 <sup>†</sup> ) | (0.29 <sup>**</sup> ) |
|       | SHBG (nmol/L)           | CONTROL         | 80 | 34.7 (31.5, 38.2)                | 33.7 (30.3, 37.5)                 | -0.9     | -2.7       | Ref.                 |                       |
|       |                         | <= 154 mins/wk  | 38 | 39.8 (34.2, 46.3)                | 38.8 (32.3, 46.6)                 | -0.9     | -2.4       | 0.95                 | Ref.                  |
|       |                         | 154-196 mins/wk | 38 | 35.0 (30.5, 40.2)                | 36.0 (31.3, 41.4)                 | 1.0      | 2.8        | 0.06                 | 0.16                  |
|       |                         | >196 mins/wk    | 34 | 43.4 (37.5, 50.4)                | 42.3 (36.9, 48.5)                 | -1.1     | -2.6       | 0.88                 | 0.86                  |
|       |                         |                 |    |                                  |                                   |          |            | (0.44 <sup>†</sup> ) | (0.91 <sup>**</sup> ) |
|       | Free Estradiol (pg/mL)  | CONTROL         | 79 | 0.30 (0.27, 0.34)                | 0.32 (0.29, 0.36)                 | 0.02     | 6.3        | Ref.                 |                       |
|       |                         | <= 154 mins/wk  | 38 | 0.33 (0.29, 0.39)                | 0.31 (0.27, 0.37)                 | -0.02    | -6.5       | 0.08                 | Ref.                  |
|       |                         | 154-196 mins/wk | 38 | 0.32 (0.27, 0.37)                | 0.31 (0.26, 0.36)                 | -0.01    | -2.8       | 0.20                 | 0.44                  |
|       |                         | >196 mins/wk    | 34 | 0.25 (0.21, 0.29)                | 0.24 (0.21, 0.29)                 | 0        | -1.6       | 0.39                 | 0.40                  |
|       |                         |                 |    |                                  |                                   |          |            | (0.30 <sup>†</sup> ) | (0.42 <sup>**</sup> ) |

| Group         | Biomarker                       |                 | N  | Baseline<br>Geometric<br>Mean<br>(95% CI) | 12-months<br>Geometric<br>Mean<br>(95% CI) | $\Delta$ | % $\Delta$ | P-Value†                | P-<br>value‡          |
|---------------|---------------------------------|-----------------|----|-------------------------------------------|--------------------------------------------|----------|------------|-------------------------|-----------------------|
|               | Free<br>Testosterone<br>(pg/mL) | CONTROL         | 80 | 4.9<br>(4.4, 5.6)                         | 5.1<br>(4.6, 5.7)                          | 0.1      | 2.6        | Ref.                    |                       |
|               |                                 | <= 154 mins/wk  | 38 | 5.4<br>(4.7, 6.1)                         | 4.7<br>(4.0, 5.4)                          | -0.7     | -13.0      | 0.05                    | Ref.                  |
|               |                                 | 154-196 mins/wk | 38 | 5.1<br>(4.5, 5.7)                         | 5.2<br>(4.4, 6.0)                          | 0.07     | 1.3        | 0.77                    | 0.19                  |
|               |                                 | >196 mins/wk    | 34 | 4.7<br>(4.1, 5.5)                         | 4.7<br>(4.1, 5.3)                          | -0.08    | -1.7       | 0.29                    | 0.26                  |
|               |                                 |                 |    |                                           |                                            |          |            | (0.45 <sup>*</sup> )    | (0.29 <sup>**</sup> ) |
| Diet+Exercise | Estrone<br>(pg/mL)              | CONTROL         | 80 | 32.0<br>(28.6, 35.8)                      | 34.6<br>(31.4, 38.1)                       | 2.6      | 8.1        | Ref.                    |                       |
|               |                                 | <= 154 mins/wk  | 39 | 34.7<br>(30.7, 39.3)                      | 30.1<br>(27.1, 33.4)                       | -4.7     | -13.4      | <0.0001                 | Ref.                  |
|               |                                 | 154-196 mins/wk | 36 | 34.0<br>(29.4, 39.2)                      | 32.1<br>(28.0, 36.7)                       | -1.9     | -5.6       | 0.01                    | 0.03                  |
|               |                                 | >196 mins/wk    | 41 | 33.2<br>(29.1, 37.9)                      | 28.7<br>(25.0, 32.9)                       | -4.5     | -13.5      | <0.0001                 | 0.54                  |
|               |                                 |                 |    |                                           |                                            |          |            | (<0.0001 <sup>*</sup> ) | (0.67 <sup>**</sup> ) |
|               | Estradiol<br>(pg/mL)            | CONTROL         | 80 | 10.9<br>(9.6-12.3)                        | 11.4<br>(10.2, 12.8)                       | 0.5      | 4.9        | Ref.                    |                       |
|               |                                 | <= 154 mins/wk  | 39 | 11.5<br>(9.9,13.4)                        | 9.3<br>(7.9, 10.9)                         | -2.2     | -19.4      | <0.0001                 | Ref.                  |
|               |                                 | 154-196 mins/wk | 36 | 11.4<br>(9.7, 13.3)                       | 9.5<br>(8.1, 11.3)                         | -1.8     | -16.2      | 0.0002                  | 0.26                  |
|               |                                 | >196 mins/wk    | 41 | 11.7<br>(10.1, 13.4)                      | 8.8<br>(7.7,10.1)                          | -2.9     | -24.5      | 0.0001                  | 0.68                  |
|               |                                 |                 |    |                                           |                                            |          |            | (<0.0001 <sup>*</sup> ) | (0.62 <sup>**</sup> ) |

| Group | Biomarker                        |                 | N  | Baseline<br>Geometric<br>Mean<br>(95% CI) | 12-months<br>Geometric<br>Mean<br>(95% CI) | $\Delta$ | % $\Delta$ | P-Value†                | P-<br>value‡          |
|-------|----------------------------------|-----------------|----|-------------------------------------------|--------------------------------------------|----------|------------|-------------------------|-----------------------|
|       | Total<br>Testosterone<br>(ng/dL) | CONTROL         | 80 | 22.8<br>(20.2, 25.7)                      | 23.2<br>(20.8, 25.9)                       | 0.4      | 1.8        | Ref.                    |                       |
|       |                                  | <= 154 mins/wk  | 39 | 25.9<br>(22.4, 30.0)                      | 23.3<br>(20.7, 26.3)                       | -2.6     | -10.0      | 0.004                   | Ref.                  |
|       |                                  | 154-196 mins/wk | 36 | 22.5<br>(19.6, 25.8)                      | 22.8<br>(19.8, 26.2)                       | 0.3      | 1.2        | 0.84                    | 0.008                 |
|       |                                  | >196 mins/wk    | 41 | 23.4<br>(20.8, 26.3)                      | 21.7<br>(18.9, 24.9)                       | -1.7     | -7.1       | 0.03                    | 0.21                  |
|       |                                  |                 |    |                                           |                                            |          |            | (0.13 <sup>†</sup> )    | (0.29 <sup>**</sup> ) |
|       | Androstenedione<br>(ng/mL)       | CONTROL         | 80 | 0.49<br>(0.44, 0.54)                      | 0.49<br>(0.45, 0.54)                       | 0.01     | 1.5        | Ref.                    |                       |
|       |                                  | <= 154 mins/wk  | 39 | 0.54<br>(0.47, 0.63)                      | 0.51<br>(0.46, 0.56)                       | -0.04    | -6.8       | 0.04                    | Ref.                  |
|       |                                  | 154-196 mins/wk | 36 | 0.51<br>(0.45, 0.59)                      | 0.54<br>(0.47, 0.63)                       | 0.03     | 5.8        | 0.56                    | 0.02                  |
|       |                                  | >196 mins/wk    | 41 | 0.52<br>(0.48, 0.57)                      | 0.48<br>(0.42, 0.55)                       | -0.04    | -8.1       | 0.13                    | 0.66                  |
|       |                                  |                 |    |                                           |                                            |          |            | (0.35 <sup>†</sup> )    | (0.82 <sup>**</sup> ) |
|       | SHBG<br>(nmol/L)                 | CONTROL         | 80 | 34.7<br>(31.5, 38.2)                      | 33.7<br>(30.3, 37.5)                       | -0.9     | -2.7       | Ref.                    |                       |
|       |                                  | <= 154 mins/wk  | 39 | 35.1<br>(31.4, 39.2)                      | 43.4<br>(38.9, 48.6)                       | 8.4      | 23.9       | <0.0001                 | Ref.                  |
|       |                                  | 154-196 mins/wk | 36 | 31.6<br>(28.0, 35.8)                      | 39.4<br>(34.9, 44.4)                       | 7.7      | 24.5       | <0.0001                 | 0.32                  |
|       |                                  | >196 mins/wk    | 41 | 35.4<br>(31.8, 39.4)                      | 45.7<br>(41.6, 50.2)                       | 10.4     | 29.3       | <0.0001                 | 0.1                   |
|       |                                  |                 |    |                                           |                                            |          |            | (<0.0001 <sup>†</sup> ) | (0.09 <sup>**</sup> ) |

| Group | Biomarker                 |                 | N  | Baseline Geometric Mean (95% CI) | 12-months Geometric Mean (95% CI) | $\Delta$ | % $\Delta$ | P-Value†   | P-value‡ |
|-------|---------------------------|-----------------|----|----------------------------------|-----------------------------------|----------|------------|------------|----------|
|       | Free Estradiol (pg/mL)    | CONTROL         | 79 | 0.30 (0.27, 0.34)                | 0.32 (0.29, 0.36)                 | 0.02     | 6.3        | Ref.       |          |
|       |                           | <= 154 mins/wk  | 39 | 0.31 (0.27, 0.36)                | 0.24 (0.20, 0.27)                 | -0.08    | -24.7      | <0.0001    | Ref.     |
|       |                           | 154-196 mins/wk | 36 | 0.32 (0.27, 0.38)                | 0.25 (0.21, 0.30)                 | -0.07    | -21.6      | <0.0001    | 0.40     |
|       |                           | >196 mins/wk    | 41 | 0.32 (0.27, 0.37)                | 0.22 (0.19, 0.26)                 | -0.1     | -30.6      | <0.0001    | 0.48     |
|       |                           |                 |    |                                  |                                   |          |            | (<0.0001*) | (0.42**) |
|       | Free Testosterone (pg/mL) | CONTROL         | 80 | 4.9 (4.4, 5.6)                   | 5.1 (4.6, 5.7)                    | 0.1      | 2.6        | Ref.       |          |
|       |                           | <= 154 mins/wk  | 39 | 5.7 (4.9, 6.5)                   | 4.6 (4.1, 5.2)                    | -1.1     | -18.8      | <0.0001    | Ref.     |
|       |                           | 154-196 mins/wk | 36 | 5.1 (4.4, 5.9)                   | 4.7 (4.0, 5.4)                    | -0.4     | -8.5       | 0.02       | 0.03     |
|       |                           | >196 mins/wk    | 41 | 5.1 (4.5, 5.7)                   | 4.2 (3.6, 4.8)                    | -0.9     | -17.9      | <0.0001    | 0.59     |
|       |                           |                 |    |                                  |                                   |          |            | (<0.0001*) | (0.73**) |

†Testing difference in change from baseline to 12 months in hormones compared to Controls.

‡Testing difference in change from baseline to 12 months in hormones compared to the lowest adherence Group, excluding Controls

\*Testing for a trend in change from baseline to 12 months in hormones from Controls through the highest adherence Group

\*\*Testing for a trend in change from baseline to 12 months in hormones from the lowest adherence Group through the highest adherence Group.
